# Supplementary material
Source: PubMed Central journal article supplement (PMC2789421)
Supplement: NIHMS160337-supplement-data.pdf [file NIHMS160337-supplement-data.pdf]

## Supporting Information for

### A Proposal for the Mechanism-of-Action of Diazoparaquinone Natural Products.

Ken S. Feldman\* and Kyle J. Eastman

*Department of Chemistry, The Pennsylvania State University, University Park, Pennsylvania 16802  
USA*

|                                                               |     |
|---------------------------------------------------------------|-----|
| General Experimental                                          | S3  |
| General Procedure 1. Phenylation of <b>10(a-c)</b>            | S3  |
| General Procedure 2. Aromatic Solvent Competition Experiments | S3  |
| General Procedure 3. Aromatic Solvent Competition Experiments | S4  |
| General Procedure 4. Varying Tin Eq Competition Experiments   | S5  |
| Trihydroxy-phenyl-benzo[b]fluorenone ( <b>10a</b> )           | S5  |
| Diacetoxy-phenyl-benzo[b]fluorenone ( <b>10b</b> )            | S5  |
| Dimethoxy-phenyl-benzo[b]fluorenone ( <b>10c</b> )            | S5  |
| Triacetoxy-phenyl-benzo[b]fluorenone ( <b>10d</b> )           | S6  |
| Trimethoxy-phenyl-benzo[b]fluorenone ( <b>10e</b> )           | S7  |
| Dimethoxy-tolyl-benzo[b]fluorenone ( <b>11a</b> )             | S7  |
| Dimethoxy-chlorophenyl-benzo[b]fluorenone ( <b>11b</b> )      | S8  |
| Dimethoxy-cyanophenyl-benzo[b]fluorenone ( <b>11c</b> )       | S9  |
| Dimethoxy-methoxyphenyl-benzo[b]fluorenone ( <b>11d</b> )     | S9  |
| Dimethoxy-dimethylphenyl-benzo[b]fluorenone ( <b>11e</b> )    | S10 |
| Dimethoxy-dimethoxyphenyl-benzo[b]fluorenone ( <b>11f</b> )   | S11 |
| Dimethoxy-dicyanophenyl-benzo[b]fluorenone ( <b>11g</b> )     | S11 |
| <sup>1</sup> H NMR <b>10b</b>                                 | S13 |
| <sup>13</sup> C NMR <b>10b</b>                                | S14 |
| <sup>1</sup> H NMR <b>10c</b>                                 | S15 |
| <sup>13</sup> C NMR <b>10c</b>                                | S16 |
| <sup>1</sup> H NMR <b>10d</b>                                 | S17 |
| <sup>13</sup> C NMR <b>10d</b>                                | S18 |
| <sup>1</sup> H NMR <b>10e</b>                                 | S19 |
| <sup>13</sup> C NMR <b>10e</b>                                | S20 |
| <sup>1</sup> H NMR <b>11a</b> ( <i>ortho</i> )                | S21 |
| <sup>1</sup> H NMR <b>11a</b> ( <i>o,m,p</i> )                | S22 |
| <sup>13</sup> C NMR <b>11a</b> ( <i>o,m,p</i> )               | S23 |
| <sup>1</sup> H NMR <b>11b</b> ( <i>ortho</i> )                | S24 |

|                                                 |     |
|-------------------------------------------------|-----|
| <sup>1</sup> H NMR <b>11b</b> ( <i>meta</i> )   | S25 |
| <sup>1</sup> H NMR <b>11b</b> ( <i>para</i> )   | S26 |
| <sup>13</sup> C NMR <b>11b</b> ( <i>o,m,p</i> ) | S27 |
| <sup>1</sup> H NMR <b>11c</b> ( <i>ortho</i> )  | S28 |
| <sup>1</sup> H NMR <b>11c</b> ( <i>meta</i> )   | S29 |
| <sup>1</sup> H NMR <b>11c</b> ( <i>para</i> )   | S30 |
| <sup>13</sup> C NMR <b>11c</b> ( <i>o,m,p</i> ) | S31 |
| <sup>1</sup> H NMR <b>11d</b> ( <i>ortho</i> )  | S32 |
| <sup>13</sup> C NMR <b>11d</b> ( <i>ortho</i> ) | S33 |
| <sup>1</sup> H NMR <b>11d</b> ( <i>m,p</i> )    | S34 |
| <sup>13</sup> C NMR <b>11d</b> ( <i>m,p</i> )   | S35 |
| <sup>1</sup> H NMR <b>11e</b> (4-isomer)        | S36 |
| <sup>13</sup> C NMR <b>11e</b> (4-isomer)       | S37 |
| <sup>1</sup> H NMR <b>11e</b> (2-isomer)        | S38 |
| <sup>13</sup> C NMR <b>11e</b> (2-isomer)       | S39 |
| <sup>1</sup> H NMR <b>11f</b> (4-isomer)        | S40 |
| <sup>13</sup> C NMR <b>11f</b> (4-isomer)       | S41 |
| <sup>1</sup> H NMR <b>11f</b> (2-isomer)        | S42 |
| <sup>13</sup> C NMR <b>11f</b> (2-isomer)       | S43 |
| <sup>1</sup> H NMR <b>11g</b> (4-isomer)        | S44 |
| <sup>13</sup> C NMR <b>11g</b> (4-isomer)       | S45 |
| <sup>1</sup> H NMR <b>11g</b> (2-isomer)        | S46 |
| <sup>13</sup> C NMR <b>11g</b> (2-isomer)       | S47 |
| References                                      | S48 |

Moisture and oxygen sensitive reactions were carried out in flame-dried glassware under an argon or nitrogen atmosphere. Benzene was distilled from sodium benzophenone ketyl under an argon atmosphere, or passed through an activated alumina column immediately before use. Toluene was distilled from sodium 9-fluorenone ketyl under argon atmosphere, or passed through an activated alumina column immediately before use. Chlorobenzene, benzonitrile, anisole, m-xylene, 1,3-dimethoxybenzene, and 1,3-cyanobenzene were purged with nitrogen for 30 min prior to use (where applicable) and otherwise used as purchased. AIBN was recrystallized from ethyl alcohol.  $\text{Bu}_3\text{SnH}$  was distilled neat and stored under nitrogen. Purification of products via flash chromatography was performed with 32-63  $\mu\text{m}$  silica gel or Analtech Uniplate 1000 micron preparative thin layer chromatography plates, with the solvent systems indicated.  $\text{CH}_2\text{Cl}_2$ , EtOAc and acetone used in flash chromatography were of HPLC grade or passed through an activated alumina column prior to use. Melting points are uncorrected. Low- and high-resolution mass spectra were obtained according to the specified technique and were performed at The Huck Institute of the Life Sciences – Proteomics and Mass Spectrometry Core Facility at The Pennsylvania State University, University Park, PA. Copies of  $^1\text{H}$  and  $^{13}\text{C}$  NMR spectra are supplied as criteria of purity.

**General Procedure 1. Phenylation of Prekinamycin and Derivatives.** AIBN (1.1 equiv) in benzene (0.06 M) was added via syringe pump addition over a period of 1 h to a stirring solution of diazoquinones **10a**, **10b** or **10c** (1 equiv) and  $\text{Bu}_3\text{SnH}$  (1.1 equiv) in benzene (0.06 M) at 80 °C. When the addition was complete, the reaction solution was allowed to cool to room temperature. After reaching room temperature the reaction mixture was concentrated in vacuo. The resulting residue was purified by flash chromatography on silica gel using the specified eluent.

**General Procedure 2. Aromatic Solvent Competition Experiments.** AIBN (1.1 equiv) in an equimolar solution of benzene and the appropriate aromatic solvent (0.06 M) was added via syringe pump addition over a period of 1 h to a stirring solution of diazoquinone **10c** (1 equiv) and  $\text{Bu}_3\text{SnH}$  (1.1 equiv) also in an equimolar solution of benzene and the appropriate aromatic solvent (0.06 M) at 80 °C. When the addition was

complete, the reaction solution was allowed to cool to room temperature. After reaching room temperature the reaction mixture was diluted with CH<sub>2</sub>Cl<sub>2</sub> and poured onto a silica gel column and purified eluting with CH<sub>2</sub>Cl<sub>2</sub> with an increasing percentage of EtOAc from 0 % to 10 %. Purification furnished the clean benzene trapped product and in most cases a mixture of *o,m,p* or the 2,4,5 isomers of the given substituted aromatic trapped product. Relative rates were quantified by product mass comparison of the substituted aromatic adducts vs. the benzene addition product. Isolation of analytical samples of pure *o*, *m* or *p* (or the 2, 4 or 5 isomers) from chromatography permitted <sup>1</sup>H NMR identification. In cases where isomer separation was not achieved, the ratios were determined by inspection of <sup>1</sup>H NMR spectra of the mixtures.

**General Procedure 3. Aromatic Solvent Competition Experiments.** AIBN (1.1 equiv) in an equimolar solution of benzene and the appropriate aromatic solvent (0.06 M) was added via syringe pump addition over a period of 1 h to a stirring solution of diazoquinone **10c** (1 equiv) and Bu<sub>3</sub>SnH (1.1 equiv) also in an equimolar solution of benzene and the appropriate solvent (0.06 M) at 80 °C. When the addition was complete, the reaction solution was allowed to cool to room temperature. After reaching room temperature the reaction mixture was diluted with CH<sub>2</sub>Cl<sub>2</sub> and poured onto a silica gel column. Purification eluting with CH<sub>2</sub>Cl<sub>2</sub> to remove tin residues, followed by an increase in polarity to 10% acetone in CH<sub>2</sub>Cl<sub>2</sub> afforded a mixture of the benzene and substituted aromatic trapped products. Relative rates were quantified by <sup>1</sup>H NMR integration of the substituted aromatic adducts vs. the benzene addition product. Ratio determination was made through similar comparison of the pure *o,m,p* (or the 2,4,5) isomer(s) <sup>1</sup>H NMR spectra to that of the mixture.

**General Procedure 4. Aromatic Solvent Competition Experiments with Varying Equivalents of Tin.** General Procedures 2 and 3 were both used varying only in the equivalents of Bu<sub>3</sub>SnH as indicated in Figure 1.

**4,5,9-Trihydroxy-2-Methyl-11-Phenyl-Benzo[b]fluoren-10-one (10a).** Following General Procedure 1, prekinamycin **1a** (18 mg, 0.057 mmol) was converted



into benzo[b]fluorenone **10a** (12.3 mg, 59%). mp 260 °C (dec); IR (neat): 3409, 1585  $\text{cm}^{-1}$ ; Presumably, due to the partial free radical nature of **10a** analogous to kinobscurinone,<sup>1</sup> **10a** appears to be “NMR silent” exhibiting neither a  $^1\text{H}$ - nor a  $^{13}\text{C}$  NMR signature; ESI  $m/z$  relative intensity 391( $\text{MNa}^+$  100); TOFHRMS (+ESI) Calcd for  $\text{C}_{24}\text{H}_{16}\text{O}_4\text{Na}$ : 391.0946, Found 391.0947.

**Acetic Acid 9-Acetoxy-5-Hydroxy-2-Methyl-10-oxo-11-Phenyl-10H-Benzo[b]fluoren-4-yl Ester (10b).** Following General Procedure 1, diazoquinone **1b** (17.5 mg, 0.044 mmol) was converted into benzo[b]fluorenone **10b** (9.8 mg, 50%). mp 200 °C (dec); IR (neat): 3330, 1789, 1766  $\text{cm}^{-1}$ ;  $^1\text{H}$  NMR (400 MHz,  $\text{CDCl}_3$ )  $\delta$  9.39 (s, 1H), 7.88 (d,  $J = 7.9$  Hz, 1H), 7.56 (t,  $J = 8.0$  Hz, 2H), 7.55 (d,  $J = 7.7$  Hz, 1H), 7.41-7.50 (m, 3H), 7.06 (d,  $J = 8.0$  Hz, 1H), 7.06 (s, 1H), 7.05 (s, 1H), 2.51 (s, 3H), 2.36 (s, 3H), 2.32 (s, 3H),  $^{13}\text{C}$  NMR (100 MHz,  $\text{CDCl}_3$ )  $\delta$  180.2, 170.2, 166.9, 151.3, 149.9, 147.9, 144.4, 143.3, 138.5, 135.7, 133.9, 133.8, 129.7, 128.8, 128.7, 128.2, 126.5, 125.4, 123.3, 123.2, 123.0, 122.6, 114.6, 21.7, 21.6, 21.3; ESI  $m/z$  relative intensity 475 ( $\text{MNa}^+$  100); TOFHRMS (+ESI) Calcd for  $\text{C}_{28}\text{H}_{20}\text{O}_6\text{Na}$ : 475.1158, Found 475.1142.

**5-Hydroxy-4,9-dimethoxy-2-methyl-11-phenyl-benzo[b]fluoren-10-one (10c).** Following General Procedure 1, diazoquinone **1c** (10.5 mg, 0.032 mmol) was converted into benzo[b]fluorenone **10c** (10.0 mg, 79%). mp 220 °C (dec); IR (neat): 3181, 1633  $\text{cm}^{-1}$ ;  $^1\text{H}$  NMR (400 MHz,  $\text{CDCl}_3$ )  $\delta$  10.76 (s, 1H), 7.58 (d,  $J = 7.6$  Hz, 1H), 7.56 (d,  $J = 6.8$  Hz, 2H), 7.48 (t,  $J = 8.2$  Hz, 1H), 7.45 (t,  $J = 7.1$  Hz, 2H), 7.39 (d,  $J = 7.2$  Hz, 1H), 7.00 (d,  $J = 8.4$  Hz, 1H), 6.81 (s, 1H), 6.67 (s, 1H), 4.09 (s, 3H), 3.90 (s, 3H), 2.32 (s, 3H);  $^{13}\text{C}$  NMR (100 MHz,  $\text{CDCl}_3$ )  $\delta$  182.0, 161.8, 151.9, 151.1, 146.6, 144.3, 138.7, 136.9, 135.0, 134.6, 130.0, 129.4, 128.4, 128.2, 128.1, 120.0, 119.2, 117.8, 115.0, 114.9, 115.2, 56.9, 56.6, 22.2; ESI  $m/z$  relative intensity 497 ( $\text{MH}^+$  50); TOFHRMS (+ESI) Calcd for  $\text{C}_{26}\text{H}_{21}\text{O}_4$ : 397.1440, Found 397.1443.

**Acetic Acid 4,5-Diacetoxy-2-Methyl-10-oxo-11-Phenyl-10H-benzo[b]fluoren-9-yl Ester (10d).** From **10a**: Pyridine (0.26 mL, 3.1 mmol) and  $\text{Ac}_2\text{O}$  (0.31 mL, 3.1 mmol) were sequentially added to a mixture of **10a** (11.0 mg, 0.031 mmol) and DMAP

(1.0 mg, 0.008 mmol) in CH<sub>2</sub>Cl<sub>2</sub> (1.0 mL) at room temperature. The dark purple mixture was stirred at room temperature for 30 min, turning to a dark red/orange color. At this time, the reaction solution was diluted with saturated aqueous NaHCO<sub>3</sub> (10 mL) and CH<sub>2</sub>Cl<sub>2</sub> (10 mL). The layers were separated and the aqueous layer was extracted with CH<sub>2</sub>Cl<sub>2</sub> (3x 10 mL). The combined organic layers were washed with water and brine, dried over Na<sub>2</sub>SO<sub>4</sub>, filtered and concentrated. The resulting dark red solid was purified by flash chromatography on silica gel (CH<sub>2</sub>Cl<sub>2</sub>) to yield the tri-acetate as a bright orange solid (8.1 mg, 52%).

From **10b**: Pyridine (0.070 mL, 0.90 mmol) and Ac<sub>2</sub>O (0.85 mL, 0.90 mmol) were sequentially added to a mixture of **10b** (4.0 mg, 0.90 mmol) and DMAP (1.0 mg, 0.008 mmol) in CH<sub>2</sub>Cl<sub>2</sub> (1.0 mL) at room temperature. The dark red mixture was stirred at room temperature for 30 min, changing to a dark red/orange color. At this time, the reaction solution was diluted with saturated aqueous NaHCO<sub>3</sub> (10 mL) and CH<sub>2</sub>Cl<sub>2</sub> (10 mL). The layers were separated and the aqueous layer was extracted with CH<sub>2</sub>Cl<sub>2</sub> (3X 10 mL). The combined organic layers were washed with water and brine, dried over Na<sub>2</sub>SO<sub>4</sub>, filtered and concentrated. The resulting dark red solid was purified by flash chromatography on silica gel (CH<sub>2</sub>Cl<sub>2</sub>). The tri-acetate was obtained as a orange solid (4.4 mg, 99%). mp 195 °C (dec); IR (neat): 1769, 1635 cm<sup>-1</sup>; <sup>1</sup>H NMR (500 MHz, CDCl<sub>3</sub>) δ 7.59 (d, *J* = 7.8 Hz, 1H), 7.58 (d, *J* = 7.3 Hz, 1H), 7.47-7.52 (m, 4H), 7.39 (d, *J* = 8.3 Hz, 1H), 7.01 (d, *J* = 7.7 Hz, 1H), 6.99 (s, 1H), 6.80 (s, 1H), 2.53 (s, 3H), 2.43 (s, 3H), 2.31 (s, 6H); <sup>13</sup>C NMR (125 MHz, CDCl<sub>3</sub>) δ 179.4, 169.6, 168.7, 167.6, 154.6, 151.4, 145.9, 145.2, 142.0, 141.1, 136.5, 133.8, 132.8, 129.4, 129.3, 129.3, 128.9, 128.0, 125.9, 125.3, 124.8, 124.2, 123.7, 121.8, 21.3, 21.2, 21.1, 20.9; ESI *m/z* relative intensity 517 (MNa<sup>+</sup> 100); TOFHRMS (+ESI) Calcd for C<sub>30</sub>H<sub>22</sub>O<sub>7</sub>Na: 517.1263, Found 517.1245.

**4,5,9-Trimethoxy-2-Methyl-11-Phenyl-Benzo[b]fluoren-10-one (10e)**. From **10a**: Methyl iodide (0.042 mL, 0.68 mmol) was added to a mixture of **10a** (25.0 mg, 0.068 mmol) and K<sub>2</sub>CO<sub>3</sub> (93.0 mg, 0.068 mmol) in DMF (2.0 mL) at room temperature. The dark purple mixture was stirred at room temperature for 12 h, turning to a dark red color. The reaction solution was then diluted with saturated aqueous NH<sub>4</sub>Cl (10 mL) and Et<sub>2</sub>O (10 mL). The layers were separated and the aqueous layer was extracted with Et<sub>2</sub>O

(3X 10 mL). The combined organic layers were washed with water and brine, dried over Na<sub>2</sub>SO<sub>4</sub>, filtered and concentrated. The resulting light red solid was purified by flash chromatography on silica gel (CH<sub>2</sub>Cl<sub>2</sub>). The tri-methylether was obtained as a bright red solid (11.5 mg, 41%).

From **10b**: Methyl iodide (0.031 mL, 0.50 mmol) was added to a mixture of **10b** (20.0 mg, 0.050 mmol) and K<sub>2</sub>CO<sub>3</sub> (69.0 mg, 0.050 mmol) in DMF (1.0 mL) at room temperature. The dark red mixture was stirred at room temperature for 12 h, turning to a light red color. The reaction was then diluted with saturated aqueous NH<sub>4</sub>Cl (10 mL) and Et<sub>2</sub>O (10 mL). The layers were separated and the aqueous layer was extracted with Et<sub>2</sub>O (3X 10 mL). The combined organic layers were washed with water and brine, dried over Na<sub>2</sub>SO<sub>4</sub>, filtered and concentrated. The resulting light red solid was purified by flash chromatography on silica gel (CH<sub>2</sub>Cl<sub>2</sub>). The tri-methylether was obtained as a bright red solid (12.0 mg, 59%). mp 210 °C (dec); IR (neat): 1643 cm<sup>-1</sup>; <sup>1</sup>H NMR (300 MHz, CDCl<sub>3</sub>) δ 7.50-7.60 (m, 2H), 7.40-7.50 (m, 5H), 6.96 (dd, *J* = 6.7, 2.7 Hz, 1H), 6.76 (s, 1H), 6.59 (s, 1H), 4.02 (s, 3H), 3.96 (s, 3H), 3.89 (s, 3H), 2.32 (s, 3H); <sup>13</sup>C NMR (75 MHz, CDCl<sub>3</sub>) δ 181.5, 161.6, 155.2, 153.0, 151.7, 145.3, 140.3, 138.7, 134.3, 134.2, 130.1, 129.2, 128.3, 127.8, 126.8, 121.4, 118.3, 118.2, 117.4, 113.9, 113.6, 63.9, 56.1, 55.9, 21.7; ESI *m/z* relative intensity 411 (MH<sup>+</sup> 100); TOFHRMS (+ESI) Calcd for C<sub>27</sub>H<sub>22</sub>O<sub>4</sub>: 411.1596, Found 411.1596.

#### **5-Hydroxy-4,9-Dimethoxy-2-Methyl-11-p-Tolyl-Benzo[b]fluoren-10-one**

**(11a)**. Following General Procedure 2, diazoquinone **1c** (20.0 mg, 0.060 mmol) was converted into a 2.2:1 mixture of benzo[b]fluorenone **11a** (*o,m,p* = 62:23:15) (7.4 mg, 30%) and benzo[b]fluorenone **10c** (3.6 mg, 15%). (*o,m,p* mixture) IR (neat): 3190, 1633 cm<sup>-1</sup>; (*o*-isomer) <sup>1</sup>H NMR (500 MHz, CDCl<sub>3</sub>) δ 10.64 (s, 1H), 7.60 (d, *J* = 7.9 Hz, 1H), 7.50 (t, *J* = 8.1 Hz, 1H), 7.22-7.36 (m, 3H), 7.19 (d, *J* = 7.3 Hz, 1H), 7.01 (d, *J* = 8.3 Hz, 1H), 6.69 (s, 1H), 6.54 (s, 1H), 4.11 (s, 3H), 3.89 (s, 3H), 2.31 (s, 3H), 2.16 (s, 3H); (*o,m,p* mixture) <sup>1</sup>H NMR (500 MHz, CDCl<sub>3</sub>) δ 10.76 (s, 0.4H, *m,p*), 10.68 (s, 0.6H, *o*) 7.60 (d, *J* = 7.7 Hz, 0.5H), 7.59 (d, *J* = 7.4 Hz, 0.5H), 7.47-7.51 (m, 1H), 7.33-7.36 (m, 1H), 7.22-7.30 (m, 2H), 7.19 (d, *J* = 6.8 Hz, 1H), 7.01 (d, *J* = 8.3 Hz, 1H), 6.85 (s, 0.25H), 6.79 (s, 0.25H), 6.69 (s, 1H), 6.54 (s, .5H), 4.11 (s, 1.8H, *o*), 4.10 (s, 1.2H, *m,p*),

3.90 (s, 1.2H, *m,p*) 3.89 (s, 1.8H, *o*), 2.35 (s, 1.8H, *m,p*), 2.31 (s, 1.8H, *o*), 2.16 (s, 3H); (*o,m,p* mixture)  $^{13}\text{C}$  NMR (125 MHz,  $\text{CDCl}_3$ )  $\delta$  181.5, 161.3, 151.5, 150.6, 145.9, 144.2, 138.5, 136.7, 136.5, 135.1, 134.0, 129.9, 129.5, 128.5, 127.6, 126.6, 125.4, 121.3, 119.4, 118.9, 118.6, 117.4, 114.6, 114.4, 111.1, 56.53, 56.5, 56.5, 21.8, 21.7, 19.9; ESI  $m/z$  relative intensity 411 ( $\text{MH}^+$  30); TOFHRMS (+ESI) Calcd for  $\text{C}_{27}\text{H}_{22}\text{O}_4$ : 411.1596, Found 411.1611.

**11-(4-Chloro-Phenyl)-5-Hydroxy-4,9-Dimethoxy-2-Methyl-Benzo[b]fluoren-10-one (11b).** Following General Procedure 2, diazoquinone **1c** (20.0 mg, 0.060 mmol) was converted into a 1.5:1 mixture of benzo[b]fluorenone **11b** (*o,m,p* = 48:32:20) (9.5 mg, 37%) and benzo[b]fluorenone **10c** (5.0 mg, 21%). **11b** isomers were separated via preparative TLC (20% EtOAc in benzene). (*o*-isomer) mp 280 °C (dec); (*o*-isomer) IR (neat): 3178, 1630  $\text{cm}^{-1}$ ; (*o*-isomer)  $^1\text{H}$  NMR (500 MHz,  $\text{CDCl}_3$ )  $\delta$  10.76 (s, 1H), 7.60 (d,  $J = 7.8$  Hz, 1H), 7.50 (m, 2H), 7.33 (m, 3H), 7.02 (d,  $J = 8.2$  Hz, 1H), 6.69 (s, 1H), 6.58 (s, 1H), 4.11 (s, 3H), 3.90 (s, 3H), 2.33 (s, 3H); (*m*-isomer) mp 260 °C (dec); (*m*-isomer) IR (neat): 3378, 1630  $\text{cm}^{-1}$ ; (*m*-isomer)  $^1\text{H}$  NMR (500 MHz,  $\text{CDCl}_3$ )  $\delta$  10.82 (s, 1H), 7.60 (d,  $J = 8.2$  Hz, 1H), 7.51 (m, 2H), 7.44 (d,  $J = 6.8$  Hz, 1H), 7.38 (t,  $J = 7.8$  Hz, 1H), 7.37 (s, 1H), 7.30 (d,  $J = 8.3$  Hz, 1H), 6.75 (s, 1H), 6.71 (s, 1H), 4.12 (s, 3H), 3.91 (s, 3H), 2.36 (s, 3H); (*p*-isomer) mp 240 °C (dec); (*p*-isomer) IR (neat): 3166, 1631  $\text{cm}^{-1}$ ; (*p*-isomer)  $^1\text{H}$  NMR (500 MHz,  $\text{CDCl}_3$ )  $\delta$  10.81 (s, 1H), 7.60 (d,  $J = 8.4$  Hz, 1H), 7.52 (d,  $J = 8.6$  Hz, 2H), 7.50 (t,  $J = 8.2$  Hz, 1H), 7.42 (d, 8.6 Hz, 2H), 7.30 (d,  $J = 8.4$  Hz, 1H), 6.79 (s, 1H), 6.71 (s, 1H), 4.12 (s, 3H), 3.92 (s, 3H), 2.35 (s, 3H); (*o,m,p*-mixture)  $^{13}\text{C}$  NMR (125 MHz,  $\text{CDCl}_3$ )  $\delta$  181.6, 181.5, 181.3, 161.3, 151.5, 151.4, 151.3, 151.1, 144.5, 143.5, 143.3, 142.3, 138.5, 136.6, 136.5, 136.4, 134.1, 133.8, 133.7, 133.2, 131.1, 130.7, 130.3, 129.5, 129.2, 129.1, 128.9, 128.3, 128.1, 127.9, 126.5, 121.1, 119.6, 119.5, 119.3, 118.5, 118.4, 118.3, 117.5, 114.7, 114.4, 114.2, 111.2, 111.1, 56.6, 56.5, 56.2, 56.1, 21.8, 21.7; ESI  $m/z$  relative intensity 431 ( $\text{MH}^+$  100); TOFHRMS (+ESI) Calcd for  $\text{C}_{26}\text{H}_{20}\text{O}_4\text{Cl}$ : 431.1050, Found 431.1060.

**4-(5-Hydroxy-4,9-Dimethoxy-2-Methyl-10-oxo-10H-Benzo[b]fluoren-11-yl)-Benzonitrile (11c).** Following General Procedure 2, diazoquinone **1c** (20.0 mg, 0.060

mmol) was converted into a 2.2:1 mixture of benzo[b]fluorenone **11c** (*o,m,p* = 43:25:32) (13.0 mg, 51%) and benzo[b]fluorenone **10c** (5.6 mg, 23%). **11c** isomers were separated via preparative TLC (20% EtOAc in benzene). (*o*-isomer) mp 265 °C (dec); (*o*-isomer) IR (neat): 3394, 2232, 1631 cm<sup>-1</sup>; (*o*-isomer) <sup>1</sup>H NMR (500 MHz, CDCl<sub>3</sub>) δ 10.87 (s, 1H), 7.77 (d, *J* = 7.6 Hz, 1H), 7.66 (t, *J* = 7.7 Hz, 1H), 7.61 (d, *J* = 7.9 Hz, 1H), 7.52 (t, *J* = 8.2 Hz, 1H), 7.49 (d, *J* = 7.8 Hz, 1H), 7.46 (t, *J* = 7.7 Hz, 1H), 7.03 (d, *J* = 8.2 Hz, 1H), 6.71 (s, 1H), 6.58 (s, 1H), 4.13 (s, 3H), 3.92 (s, 3H), 2.34 (s, 3H); (*m*-isomer) mp 265 °C (dec); (*m*-isomer) IR (neat): 3412, 2216, 1633 cm<sup>-1</sup>; (*m*-isomer) <sup>1</sup>H NMR (500 MHz, CDCl<sub>3</sub>) δ 10.88 (s, 1H), 7.82 (d, *J* = 8.0 Hz, 1H), 7.81 (s, 1H), 7.67 (d, *J* = 7.7 Hz, 1H), 7.61 (d, *J* = 7.8 Hz, 1H), 7.54 (t, *J* = 8.0 Hz, 1H), 7.47 (t, *J* = 8.1 Hz, 1H), 7.04 (d, *J* = 7.7 Hz, 1H), 6.72 (s, 1H), 6.70 (s, 1H), 4.13 (s, 3H), 3.93 (s, 3H), 2.37 (s, 3H); (*p*-isomer) mp 265 °C (dec); (*p*-isomer) IR (neat): 3412, 2223, 1631 cm<sup>-1</sup>; (*p*-isomer) <sup>1</sup>H NMR (500 MHz, CDCl<sub>3</sub>) δ 10.92 (s, 1H), 7.73 (d, *J* = 8.4 Hz, 2H), 7.66 (d, *J* = 8.5 Hz, 2H), 7.61 (d, *J* = 7.8 Hz, 1H), 7.52 (t, *J* = 8.2 Hz, 1H), 7.04 (d, *J* = 8.3 Hz, 1H), 6.72 (s, 1H), 6.71 (s, 1H), 4.13 (s, 3H), 3.92 (s, 3H), 2.36 (s, 3H); (*o,m,p*-mixture) <sup>13</sup>C NMR (125 MHz, CDCl<sub>3</sub>) δ 181.7, 181.6, 181.4, 161.5, 161.4, 152.4, 152.1, 151.6, 151.5, 143.1, 143.0, 142.9, 139.9, 139.6, 138.7, 138.6, 138.5, 136.4, 136.3, 136.2, 134.4, 133.0, 132.9, 132.3, 131.7, 131.5, 130.8, 130.4, 130.0, 129.7, 128.8, 127.9, 121.0, 119.5, 118.3, 118.1, 118.0, 117.9, 117.8, 115.2, 114.4, 114.3, 114.2, 113.1, 112.1, 111.4, 111.3, 111.3, 56.6, 56.5, 56.3, 56.3, 56.2, 21.8; ESI *m/z* relative intensity 444 (MNa<sup>+</sup> 100); TOFHRMS (+ESI) Calcd for C<sub>27</sub>H<sub>19</sub>NO<sub>4</sub>Na: 444.1212, Found 444.1215.

**5-Hydroxy-4,9-Dimethoxy-11-(4-Methoxy-Phenyl)-2-Methyl-Benzo[b]fluoren-10-one (11d).** Following General Procedure 2, diazoquinone **1c** (20.0 mg, 0.060 mmol) was converted into a 3.2:1 mixture of benzo[b]fluorenone **11d** (*o,m,p* = 76:16:12) (14.5 mg, 57%) and benzo[b]fluorenone **10c** (4.3 mg, 18%). (*o*-isomer) mp 210 °C (dec); (*o*-isomer) IR (neat): 3182, 1632 cm<sup>-1</sup>; (*o*-isomer) <sup>1</sup>H NMR (500 MHz, CDCl<sub>3</sub>) δ 10.70 (s, 1H), 7.58 (d, *J* = 7.9 Hz, 1H), 7.48 (t, *J* = 8.1 Hz, 1H), 7.36 (t, *J* = 7.6 Hz, 1H), 7.34 (d, *J* = 7.7 Hz, 1H), 7.03 (t, *J* = 7.5 Hz, 1H), 7.01 (d, *J* = 8.2 Hz, 1H), 7.0 (d, *J* = 8.3 Hz, 1H), 6.66 (s, 1H), 6.65 (s, 1H), 4.10 (s, 3H), 3.89 (s, 3H), 3.73 (s, 3H), 2.32 (s, 3H); (*o*-isomer) <sup>13</sup>C NMR (125 MHz, CDCl<sub>3</sub>) δ 181.3, 161.2, 157.4, 151.4, 150.4,

144.0, 142.8, 138.1, 136.5, 133.8, 130.7, 130.0, 129.2, 124.3, 121.6, 120.4, 119.4, 118.7, 117.3, 114.7, 114.6, 111.3, 110.9, 56.5, 56.1, 55.7, 21.8; (*m,p*-isomer) IR (neat): 3178, 2216, 1622  $\text{cm}^{-1}$ ; (*m,p*-isomer)  $^1\text{H}$  NMR (500 MHz,  $\text{CDCl}_3$ )  $\delta$  10.78 (s, 0.43H, *p*), 10.76 (s, 0.57H, *m*), 7.59 (d,  $J = 7.3$  Hz, 1H), 7.58 (d,  $J = 8.4$  Hz, 1H), 7.49 (t,  $J = 8.0$  Hz, 1H), 7.37 (t,  $J = 8.0$  Hz, 1H), 7.14 (d,  $J = 7.6$  Hz, 0.5H), 6.98-7.06 (m, 2H), 6.93 (d,  $J = 8.6$  Hz, 0.5H), 6.88 (s, 0.5H), 6.82 (s, 0.5H), 6.69 (s, 1H), 4.10 (s, 3H), 3.91 (s, 3H), 3.88 (s, 1.5H), 3.88 (s, 1.5H), 2.35 (s, 1.5H), 2.34 (s, 1.5H); (*p*-isomer) IR (neat): 3412, 2223, 1631  $\text{cm}^{-1}$ ; (*m,p*-isomer)  $^{13}\text{C}$  NMR (125 MHz,  $\text{CDCl}_3$ )  $\delta$  181.6, 181.3, 161.4, 161.2, 159.6, 159.2, 157.4, 151.4, 150.8, 150.4, 150.2, 149.4, 146.2, 145.8, 144.0, 142.8, 138.6, 138.2, 136.5, 136.4, 136.2, 136.1, 134.0, 133.8, 133.7, 131.2, 130.7, 130.0, 129.2, 128.9, 128.7, 128.3, 126.6, 124.3, 122.1, 122.0, 121.7, 121.6, 120.4, 119.8, 119.4, 118.9, 118.8, 118.7, 117.4, 117.3, 114.8, 114.7, 114.6, 114.4, 113.7, 113.6, 113.2, 111.3, 111.1, 110.9, 110.5, 56.5, 56.4, 56.1, 56.0, 55.7, 55.3, 55.2, 21.8, 21.7; ESI  $m/z$  relative intensity 449 ( $\text{MNa}^+ 85$ ); TOFHRMS (+ESI) Calcd for  $\text{C}_{27}\text{H}_{22}\text{O}_5\text{Na}$ : 449.1365, Found 449.1346.

### 11-(3,5-Dimethyl-phenyl)-5-Hydroxy-4,9-Dimethoxy-2-Methyl-

**Benzo[b]fluoren-10-one (11e).** Following General Procedure 2, diazoquinone **1c** (20.0 mg, 0.060 mmol) was converted into a 3.14:1 mixture of benzo[b]fluorenone **11e** (2:4:5 = 50:50:0) (11.5 mg, 44%) and benzo[b]fluorenone **10c** (3.4 mg, 14%). **11e** isomers were separated via preparative TLC (1% EtOAc in  $\text{CH}_2\text{Cl}_2$ ). (4-isomer) mp 220  $^\circ\text{C}$  (dec); (4-isomer) IR (neat): 3195, 1633  $\text{cm}^{-1}$ ; (4-isomer)  $^1\text{H}$  NMR (500 MHz,  $\text{CDCl}_3$ )  $\delta$  10.67 (s, 1H), 7.59 (d,  $J = 7.3$  Hz, 1H), 7.49 (t,  $J = 8.0$  Hz, 1H), 7.12 (s, 1H), 7.09 (d,  $J = 7.7$  Hz, 1H), 7.05 (d,  $J = 7.7$  Hz, 1H), 7.00 (d,  $J = 8.2$  Hz, 1H), 6.68 (s, 1H), 6.58 (s, 1H), 4.11 (s, 3H), 3.89 (s, 3H), 2.37 (s, 3H), 2.30 (s, 3H), 2.13 (s, 3H); (4-isomer)  $^{13}\text{C}$  NMR (125 MHz,  $\text{CDCl}_3$ )  $\delta$  181.5, 161.3, 151.4, 150.4, 146.1, 144.3, 138.4, 137.1, 136.5, 136.5, 133.9, 131.9, 130.8, 129.9, 128.4, 126.1, 121.4, 119.4, 118.6, 117.3, 114.5, 114.4, 111.1, 56.5, 56.1, 21.7, 21.3, 19.8; (2-isomer) mp 250  $^\circ\text{C}$  (dec); (2-isomer) IR (neat): 3194, 1633  $\text{cm}^{-1}$ ; (2-isomer)  $^1\text{H}$  NMR (500 MHz,  $\text{CDCl}_3$ )  $\delta$  10.64 (s, 1H), 7.60 (d,  $J = 7.5$  Hz, 1H), 7.49 (t,  $J = 7.8$  Hz, 1H), 7.18 (t,  $J = 8.1$  Hz, 1H), 7.10 (d,  $J = 7.6$  Hz, 2H), 7.01 (d,  $J = 8.1$  Hz, 1H), 6.69 (s, 1H), 6.45 (s, 1H), 4.12 (s, 3H), 3.89 (s, 3H), 2.30 (s, 3H), 2.04 (s, 6H); (2-isomer)  $^{13}\text{C}$  NMR (125 MHz,  $\text{CDCl}_3$ )  $\delta$  181.5, 161.3, 151.5, 150.3, 145.9, 143.3,

138.6, 136.6, 135.9, 134.8, 134.0, 130.8, 130.0, 127.1, 127.0, 121.1, 119.5, 118.0, 117.3, 114.5, 111.2, 56.4, 56.1, 20.7 20.1; ESI  $m/z$  relative intensity 425 ( $MH^+$  50); TOFHRMS (+ESI) Calcd for  $C_{28}H_{25}O_4$ : 425.1753, Found 425.1740.

**11-(3,5-Dimethoxy-Phenyl)-5-Hydroxy-4,9-Dimethoxy-2-Methyl-**

**Benzo[b]fluoren-10-one (11f).** Following General Procedure 2, diazoquinone **1c** (20.0 mg, 0.060 mmol) was converted into a 4.2:1 mixture of benzo[b]fluorenone **11f** (2:4:5 = 31:69:0) (16.2 mg, 59%) and benzo[b]fluorenone **10c** (3.4 mg, 14%). (4-isomer) mp 190 °C (dec); (4-isomer) IR (neat): 3195, 1633  $cm^{-1}$ ; (4-isomer)  $^1H$  NMR (500 MHz,  $CDCl_3$ )  $\delta$  10.68 (s, 1H), 7.57 (d,  $J = 7.6$  Hz, 1H), 7.46 (t,  $J = 8.2$  Hz, 1H), 7.31 (d,  $J = 8.9$  Hz, 1H), 6.99 (d,  $J = 8.3$  Hz, 1H), 6.70 (s, 1H), 6.65 (s, 1H), 6.59 (m, 2H), 4.08 (s, 3H), 3.89 (s, 3H), 3.87 (s, 3H), 3.72 (s, 3H), 2.32 (s, 3H); (4-isomer)  $^{13}C$  NMR (125 MHz,  $CDCl_3$ )  $\delta$  181.3, 161.2, 160.9, 158.9, 151.4, 150.0, 144.1, 142.8, 138.0, 136.5, 133.6, 131.5, 128.3, 121.8, 119.5, 118.8, 117.2, 116.8, 114.7, 114.5, 110.9, 104.5, 99.0, 56.5, 56.1, 55.6, 55.4, 21.8; (2-isomer) mp 180 °C (dec); (2-isomer) IR (neat): 3190, 1633  $cm^{-1}$ ; (2-isomer)  $^1H$  NMR (500 MHz,  $CDCl_3$ )  $\delta$  10.80 (s, 1H), 7.58 (d,  $J = 8.1$  Hz, 1H), 7.47 (t,  $J = 8.1$  Hz, 1H), 7.30 (t,  $J = 8.3$  Hz, 1H), 6.99 (d,  $J = 8.2$  Hz, 1H), 6.65 (d,  $J = 8.5$  Hz, 2H), 6.64 (s, 1H), 6.57 (s, 1H), 4.08 (s, 3H), 3.89 (s, 3H), 3.68 (s, 6H), 2.30 (s, 3H); (2-isomer)  $^{13}C$  NMR (125 MHz,  $CDCl_3$ )  $\delta$  181.1, 161.1, 158.5, 151.5, 150.0, 144.0, 130.4, 138.1, 136.7, 136.3, 133.6, 129.1, 121.6, 119.5, 118.5, 117.2, 114.9, 114.5, 113.7, 113.3, 110.9, 110.6, 104.3, 56.2, 56.1, 56.0, 21.8; ESI  $m/z$  relative intensity 457 ( $MH^+$  30); TOFHRMS (+ESI) Calcd for  $C_{28}H_{25}O_6$ : 457.1651, Found 457.1653.

**5-(5-Hydroxy-4,9-Dimethoxy-2-Methyl-10-oxo-10H-Benzo[b]fluoren-11-yl)-**

**Isophthalonitrile (11g).** Due to the insolubility of 1,3-dicyanobenzene in benzene at 80 °C, the following experiment was run at a 13:1 ratio of benzene : 1,3-dicyanobenzene. Solid AIBN (11.0 mg, 0.066 mmol) was added portionwise over a period of 1 h to a stirring solution of diazoquinone **10c** (20.0 mg, 0.060 mmol), 1,3-dicyanobenzene (0.11g, .86 mmol) and  $Bu_3SnH$  (0.018 mL, 0.066 mmol) in benzene (1.0 mL, 11 mmol) at 80 °C. When the addition was complete, the reaction solution was allowed to cool to room temperature. After reaching room temperature the reaction mixture was diluted with

CH<sub>2</sub>Cl<sub>2</sub> and purified with flash column chromatography, eluting with an increasing percentage of EtOAc from 0 % to 10 % in CH<sub>2</sub>Cl<sub>2</sub>. Purification furnished a 1:2.2 mixture of benzo[b]fluorenone **11g** (2:4:5 = 24:76:0) (6.5 mg, 24%) and benzo[b]fluorenone **10c** (12.4 mg, 52%). The ratio of **11g** : **10c**, ratioed up to equimolar amounts of benzene and 1,3-dicyanobenzene, is calculated to be 6.0:1. **11g** isomers were separated via preparative TLC (20% EtOAc in benzene). (4-isomer) mp 270 °C (dec); (4-isomer) IR (neat): 3213, 2526, 1633 cm<sup>-1</sup>; (4-isomer) <sup>1</sup>H NMR (500 MHz, CDCl<sub>3</sub>) δ 10.97 (s, 1H), 8.04 (s, 1H), 7.91 (d, *J* = 8.1 Hz, 1H), 7.63 (d, *J* = 8.1 Hz, 1H), 7.61 (d, *J* = 7.3 Hz, 1H), 7.53 (t, *J* = 8.1 Hz, 1H), 7.06 (d, *J* = 8.1 Hz, 1H), 6.72 (s, 1H), 6.54 (s, 1H), 4.13 (s, 3H), 3.93 (s, 3H), 2.35 (s, 3H); (4-isomer) <sup>13</sup>C NMR (125 MHz, CDCl<sub>3</sub>) δ 181.4, 161.5, 153.7, 151.7, 144.6, 141.8, 138.9, 137.4, 136.2, 136.2, 135.3, 134.8, 131.4, 131.3, 120.58, 119.6, 118.1, 117.2, 117.1, 116.2, 115.6, 115.0, 114.0, 112.3, 111.5, 56.6, 56.3, 21.8; (2-isomer) mp 290 °C (dec); (2-isomer) IR (neat): 3213, 2238, 1631 cm<sup>-1</sup>; (2-isomer) <sup>1</sup>H NMR (500 MHz, CDCl<sub>3</sub>) δ 10.99 (s, 1H), 7.96 (d, *J* = 8.0 Hz, 1H), 7.62 (d, *J* = 8.2 Hz, 1H), 7.60 (t, *J* = 7.9 Hz, 1H), 7.53 (d, *J* = 8.2 Hz, 1H), 7.06 (d, *J* = 8.4 Hz, 2H) 6.72 (s, 1H), 6.48 (s, 1H), 4.13 (s, 3H), 3.93 (s, 3H), 2.34 (s, 3H); (2-isomer) <sup>13</sup>C NMR (125 MHz, CDCl<sub>3</sub>) δ 161.5, 153.9, 151.7, 144.4, 141.5, 138.8, 136.5, 136.3, 135.0, 134.8, 132.2, 131.9, 128.4, 120.5, 119.6, 118.2, 117.1, 116.4, 115.5, 115.0, 114.1, 111.6, 56.6, 56.4, 21.9; ESI m/z relative intensity 469 (MNa<sup>+</sup> 100); TOFHRMS (+ESI) Calcd for C<sub>28</sub>H<sub>18</sub>N<sub>2</sub>O<sub>4</sub>Na: 469.1164, Found 469.1156.



Current Data Parameters  
 NAME KJE-B-05  
 EXPNO 13  
 PROCNO 1

F2 - Acquisition Parameters

Date\_ 20050808  
 Time 20.38  
 INSTRUM spect  
 PROBHD 5 mm BBI 1H-B  
 PULPROG zg30  
 TD 65536  
 SOLVENT CDCl3  
 NS 512  
 DS 2  
 SWH 8278.146 Hz  
 FIDRES 0.126314 Hz  
 AQ 3.9184243 sec  
 RG 2580.3  
 Dq 60.400 usec  
 DE 6.00 usec  
 TE 300.0 K  
 D1 1.00000000 sec

\*\*\*\*\* CHANNEL f1 \*\*\*\*\*

NUC1 1H  
 P1 6.45 usec  
 PL1 0.00 dB  
 SF01 400.1324710 MHz

F2 - Processing parameters

SI 32768  
 SF 400.1300932 MHz  
 MDW no  
 SSB 0  
 LB 0.00 Hz  
 GB 0  
 PC 1.00

1D NMR plot parameters

CX 20.00 cm  
 F1 12.000 ppm  
 F2 4801.56 Hz  
 F2P -0.500 ppm  
 F2 -200.07 Hz  
 PRMCM 0.62500 ppm/cm  
 HZCM 250.08125 Hz/cm

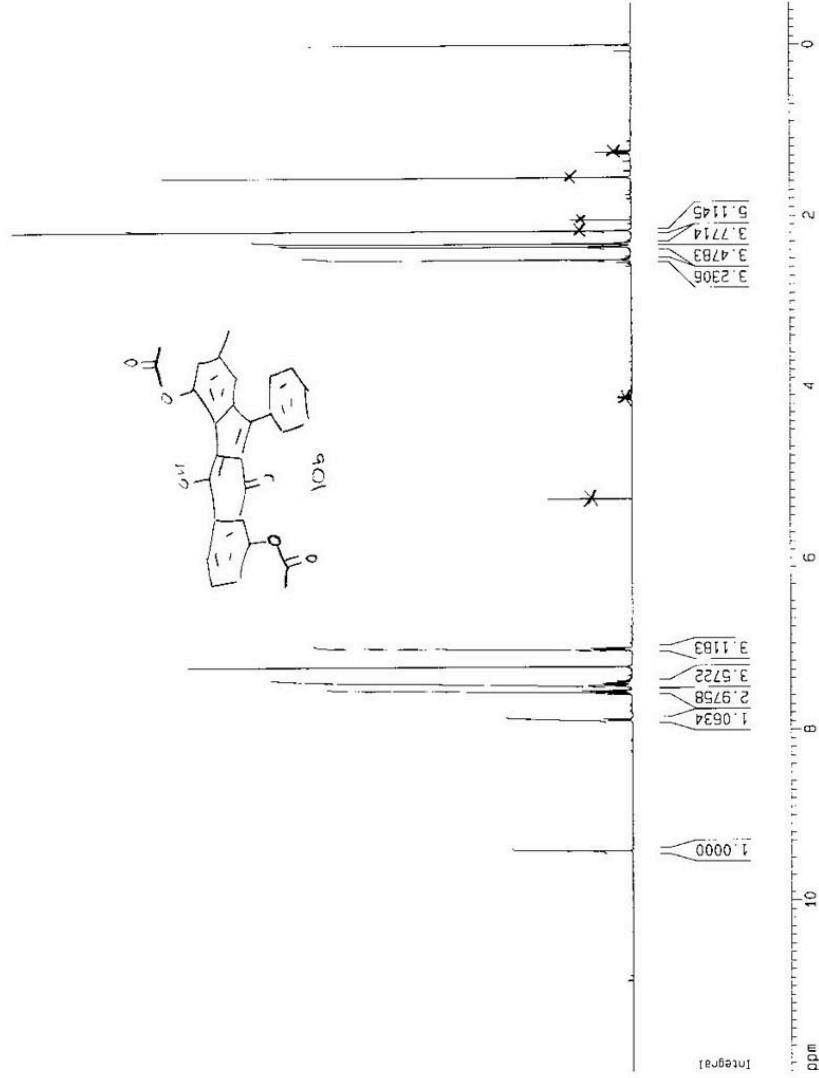

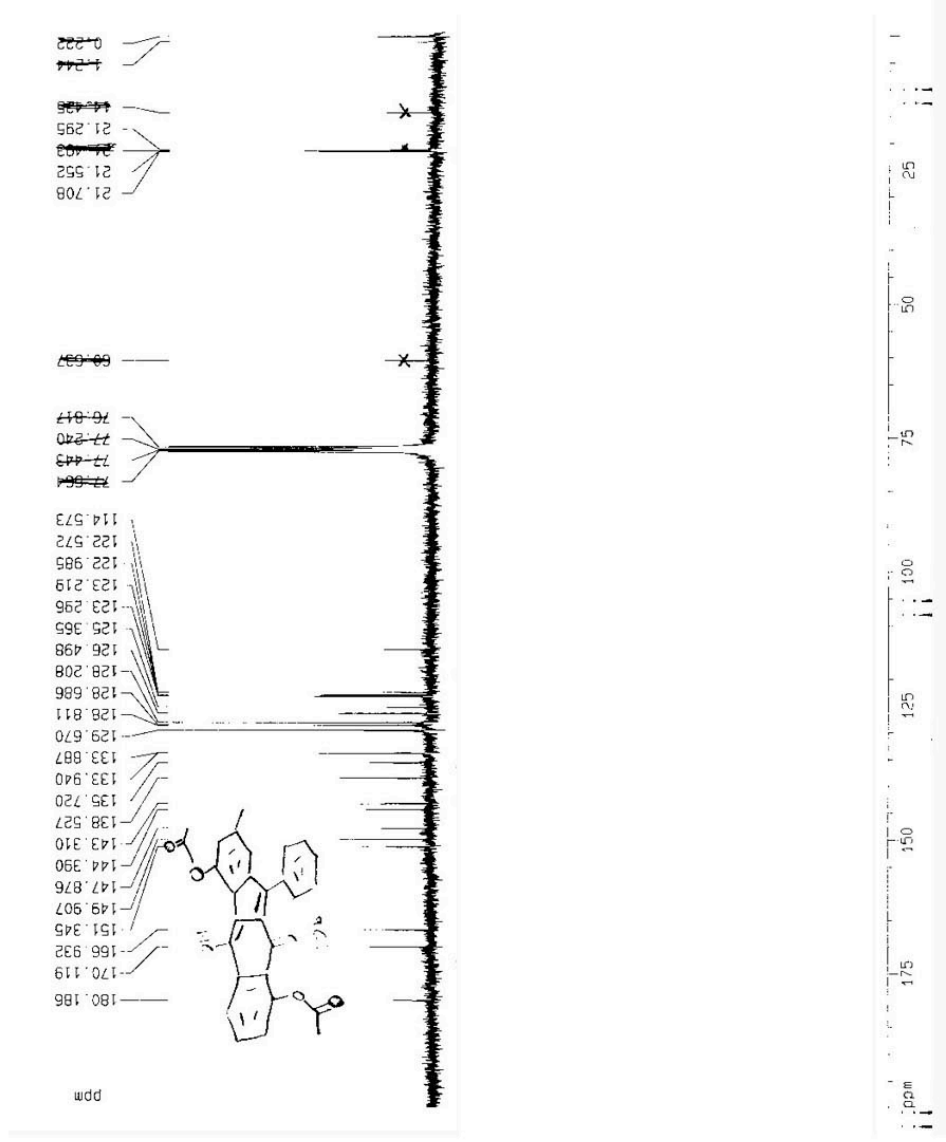

Current Data Parameters  
 NAME KJE-6-B-04  
 EXPNO 2  
 PROCNO 1

F2 - Acquisition Parameters  
 Date\_ 20040609  
 Time 8.10  
 INSTRUM spect  
 PROBHD 5 mm QNP 1H/1  
 PULPROG zgpg30  
 ID 65536  
 SOLVENT CDCl3  
 NS 15095  
 DS 4  
 SWH 18796.562 Hz  
 FIDRES 0.238919 Hz  
 AQ 1.743376 sec  
 SFO 283.600 MHz  
 ZG 28.800 usec  
 ZC 5.00 usec  
 ZD 300.0 usec  
 TE 300.2 K  
 T1 2.00000000 sec  
 T1RHO 0.03000000 sec  
 T12 0.00020000 sec

\*\*\*\*\* CHANNEL f1 \*\*\*\*\*  
 NUC1 13C  
 P1 5.40 usec  
 PL1 -6.00 dB  
 SFO1 75.4106357 MHz

\*\*\*\*\* CHANNEL f2 \*\*\*\*\*  
 CROPRG2 waltz16  
 NUC2 1H  
 PPRG2 115.00 usec  
 PL2 0.00 dB  
 P-12 20.00 dB  
 PL13 20.00 dB  
 SFO2 299.8711955 MHz

F2 - Processing parameters  
 SI 32768  
 SF 75.4023567 MHz  
 KDM EM  
 SSB 0  
 LB 1.00 Hz  
 GB 0  
 PC 1.40

3D NMR plot parameters  
 CX 30.00 cm  
 F1 200.000 rpm  
 F2 15000.47 Hz  
 F3 -930 rpm  
 SFO 283.600 MHz  
 SFO2 299.8711955 MHz  
 SFO3 75.4023567 MHz

Current Data Parameters  
 NAME KJE-5-20-05  
 EXPNO 1  
 PROCNO 1

F2 - Acquisition Parameters  
 Date\_ 20050520  
 Time 10:39  
 INSTRUM spect  
 PROBHD 5 mm BBI 1H-B  
 PULPROG zg30  
 TD 65536  
 SOLVENT DMS-D  
 NS 256  
 DS 2  
 SMH B2/B 1.45 Hz  
 FIDRES 0.126314 Hz  
 AQ 3.9564243 sec  
 RG 287.4  
 DM 60.400 usec  
 DE 5.00 usec  
 TE 300.0 K  
 D1 1.00000000 sec

===== CHANNEL f1 =====  
 NUC1 1H  
 P1 6.45 usec  
 PL1 0.00 dB  
 SF01 400.1324710 MHz

F2 - Processing parameters  
 SI 32768  
 SF 400.1300110 MHz  
 WDW EM  
 SSB 0  
 LB 0.30 Hz  
 GB 0  
 PC 1.00

1D NMR plot parameters  
 CX 20.00 cm  
 F1P 12.000 ppm  
 F1 4601.56 Hz  
 F2P -0.500 ppm  
 F2 -200.07 Hz  
 PPMCM 0.62500 ppm/cm  
 HZCM 250.08125 Hz/cm

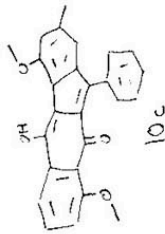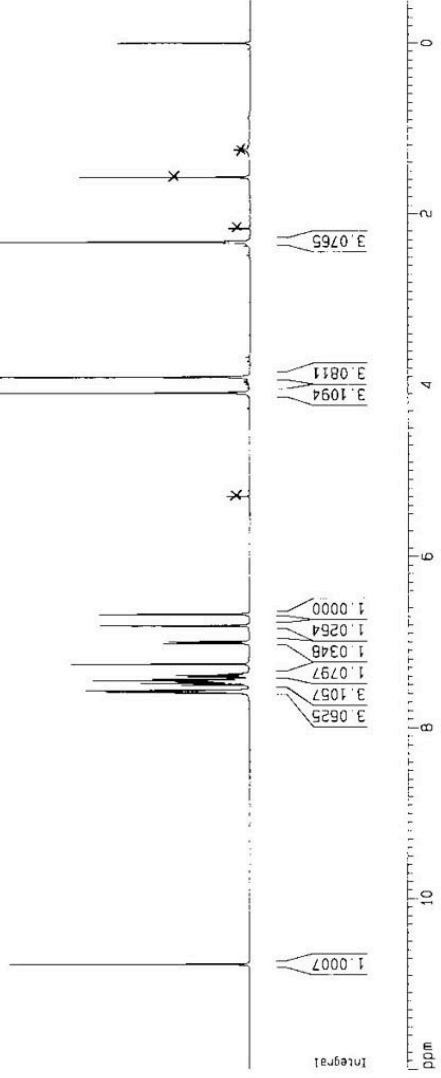

```

Current Data Parameters
NAME      KJE-5-20-05
EXPNO    2
PROCNO   1

F2 - Acquisition Parameters
Date_    20050520
Time     15 16
INSTRUM spect
PROBHD   5 mm BBI 1H 6
PULPROG zgpg30
TD        65536
SOLVENT  COC13
NS        5296
DS        4
SWH       25125.629 HZ
FIDRES   0.383287 HZ
AQ        1.3042364 SEC
RG        14956.5
DM        19.500 USEC
DE        6.00 USEC
TE        300.0 K
D1        2.0000000 SEC
d11       0.0300000 SEC
d12       0.0002000 SEC

***** CHANNEL f1 *****
NUC1      13C
P1        16.35 USEC
PL1       -6.00 DB
SFO1      100.6237569 MHZ

***** CHANNEL f2 *****
CPOPRG2   waitz15
NUC2       1H
PCPD2     114.00 USEC
PL2       0.00 DB
PL12      24.00 DB
PL13      24.00 DB
SFO2      400.1315005 MHZ

F2 - Processing parameters
SI         32768
SF         100.6127290 MHZ
RG         0
WDW        EM
SSB        0
LB         1.00 HZ
GB         0
PC         1.40

1D NMR plot parameters
CX         20.00 cm
FLP        200.000 dBm
F1         20122.55 KHz
F2         -0.500 dBm
F2         -50.31 HZ
PPMCH     10.02500 dBm/cm
HZCA      1008.64664 KHz/cm

```

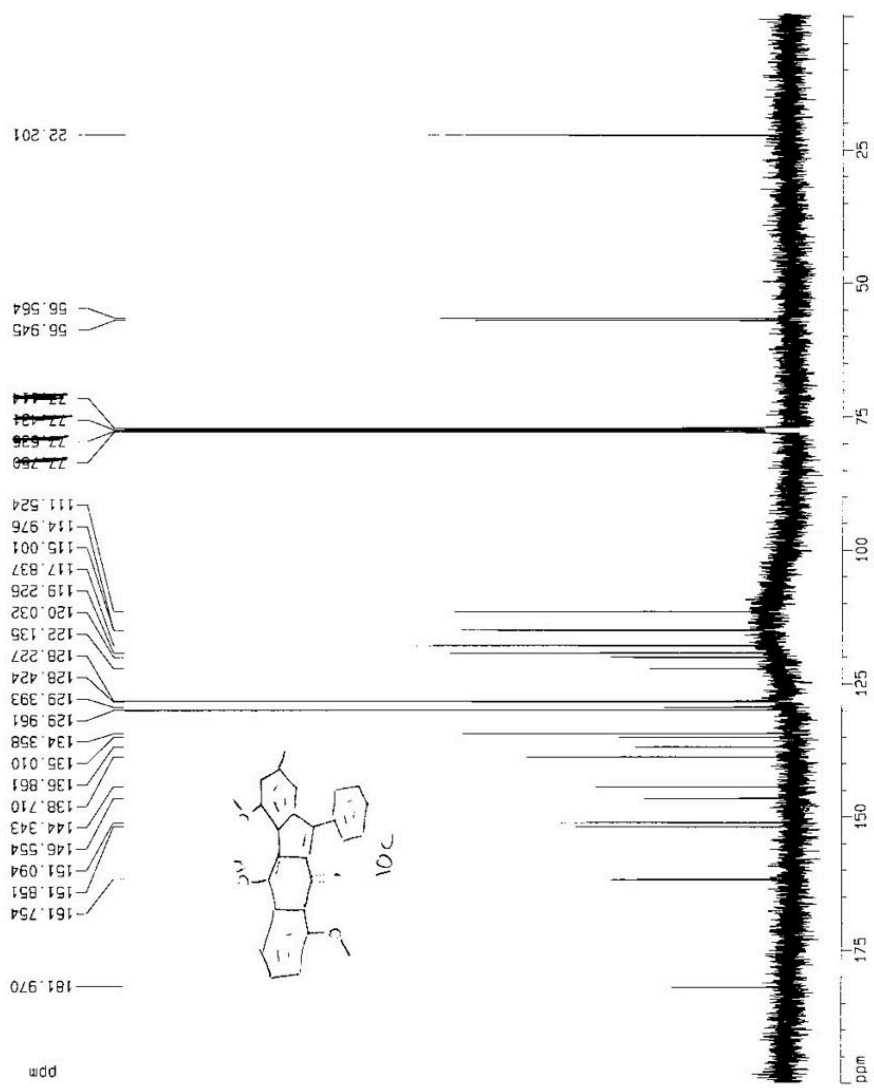

Current Data Parameters  
 NAME KUL-5-28-05  
 EXPNO 1  
 PROCNO 1

F2 - Acquisition Parameters  
 Date\_ 20060528  
 Time 11.15  
 Type Spec  
 NUS ROM 5 mm Dual 73  
 P1 49.30  
 P2 32.69  
 T3  
 SOLVENT CDCl3  
 NS 256  
 DS 2  
 SWH 10416.667 Hz  
 F1 0.317951 Hz  
 AQ 1.5723740 sec  
 RG 4096  
 DM 48 300 usec  
 DE 68.57 usec  
 TE 300.0 K  
 T1 4.1  
 D1 1.0000000 sec  
 d1 11.75 usec  
 SFO1 500.1330885 MHz  
 NUC1EUS 1H

F2 Processing parameters  
 SI 16384  
 S- 500.1330143 MHz  
 NUC1 1H  
 SSB 0  
 E 0.00 Hz  
 G3 0  
 PC 1.00

13 NMR plot parameters  
 CX 20.00 cm  
 F1 12 000 ppr  
 F2 6001.56 Hz  
 F3 -0.500 ppr  
 F4 -250.07 Hz  
 GAMMA 0.62900 ppr/cm  
 WZCM 312.56124 Hz/cm

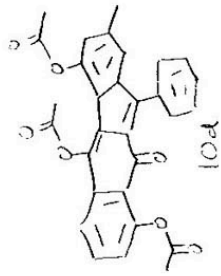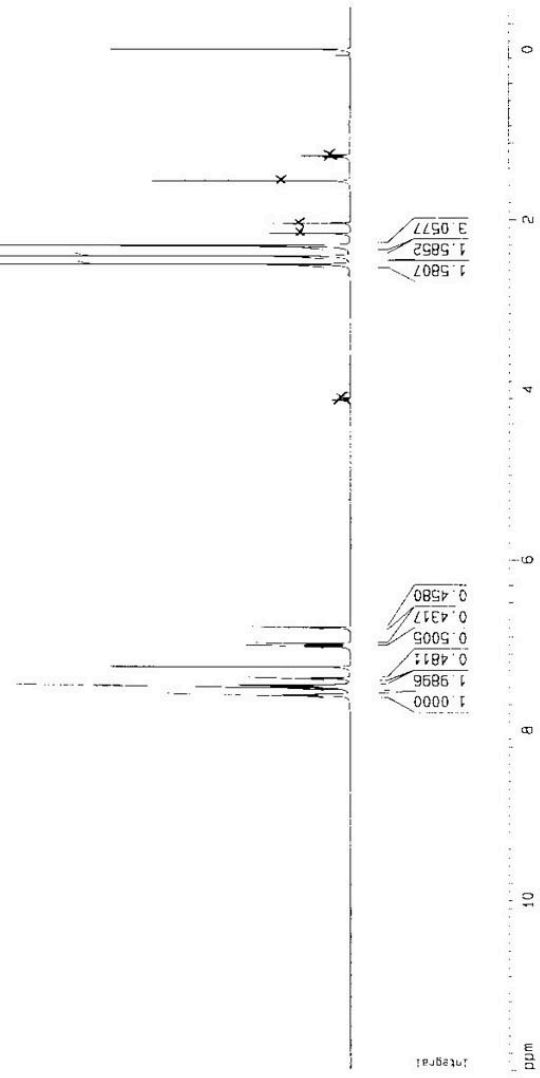

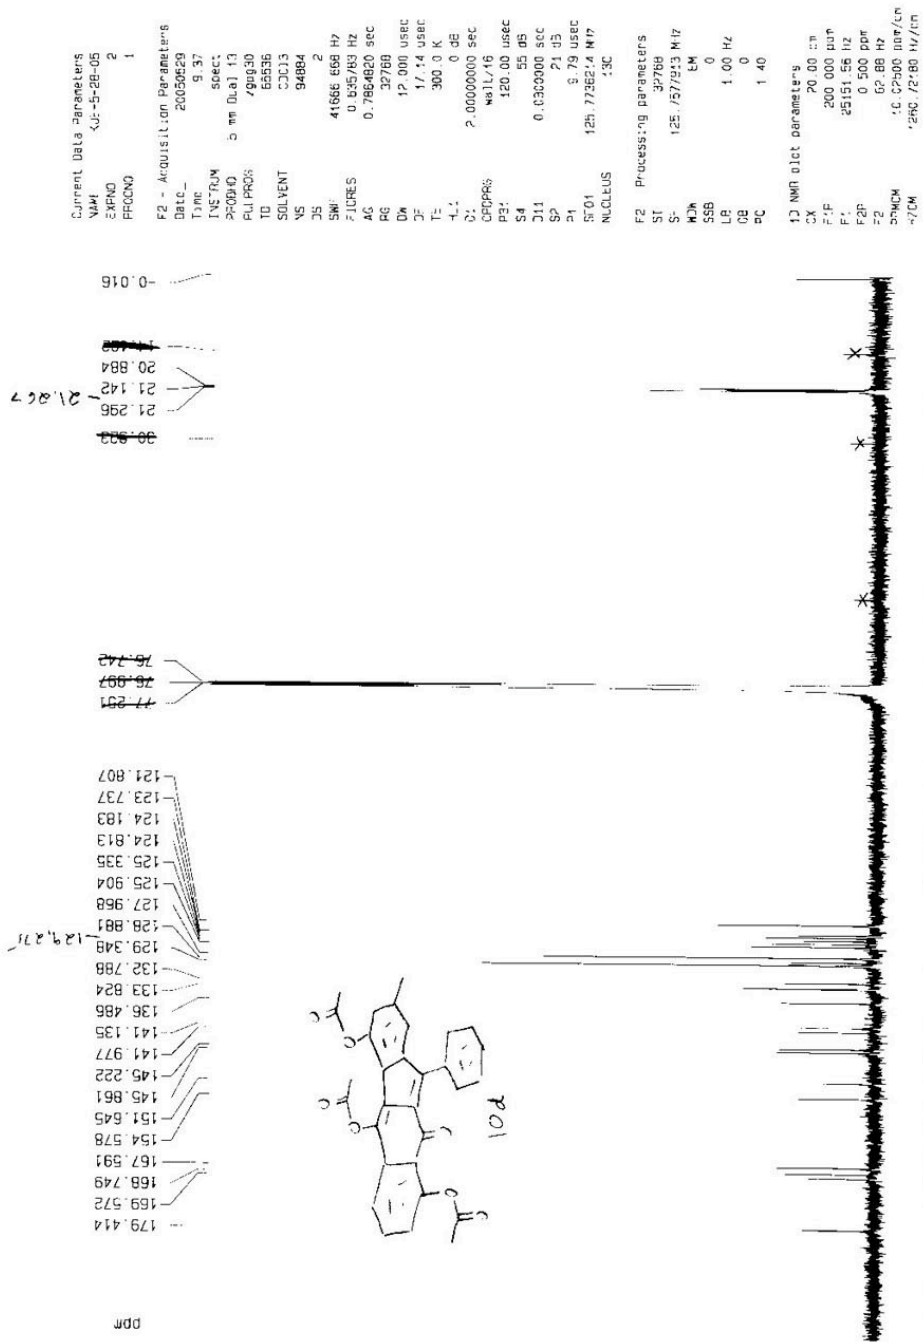

Current Data Parameters  
 NAME KUE-6-B-05  
 EXPNO 1  
 PROCNO 1

F2 - Acquisition Parameters  
 Date\_ 20090606  
 Time 20:34  
 INSTRUM Spect  
 PROBHD 5 mm Multinu  
 PULPROG zg30  
 TD 65536  
 SOLVENT CDCl3  
 NS 512  
 DS 2  
 SWH 6172.839 Hz  
 FIDRES 0.084190 Hz  
 AQ 5.3084660 sec  
 RG 645.1  
 DM 61.000 usec  
 DE 6.00 usec  
 TE 300.0 K  
 D1 1.00000000 sec

\*\*\*\*\* CHANNEL f1 \*\*\*\*\*  
 NUC1 1H  
 P1 9.60 usec  
 PL 0.00 dB  
 SF01 300.1318634 MHz

F2 - Processing parameters  
 SI 32768  
 SF 300.1300062 MHz  
 MD 0  
 SS 0  
 LB 0.00 Hz  
 GB 0  
 PC 1.00

1D NMR plot parameters  
 CX 20.00 cm  
 FJP 10.000 ppm  
 F1 3001.30 Hz  
 F2P -0.500 ppm  
 F2 -150.07 Hz  
 PPMCM 0.52500 ppm/cm  
 HZCM 157.56825 Hz/cm

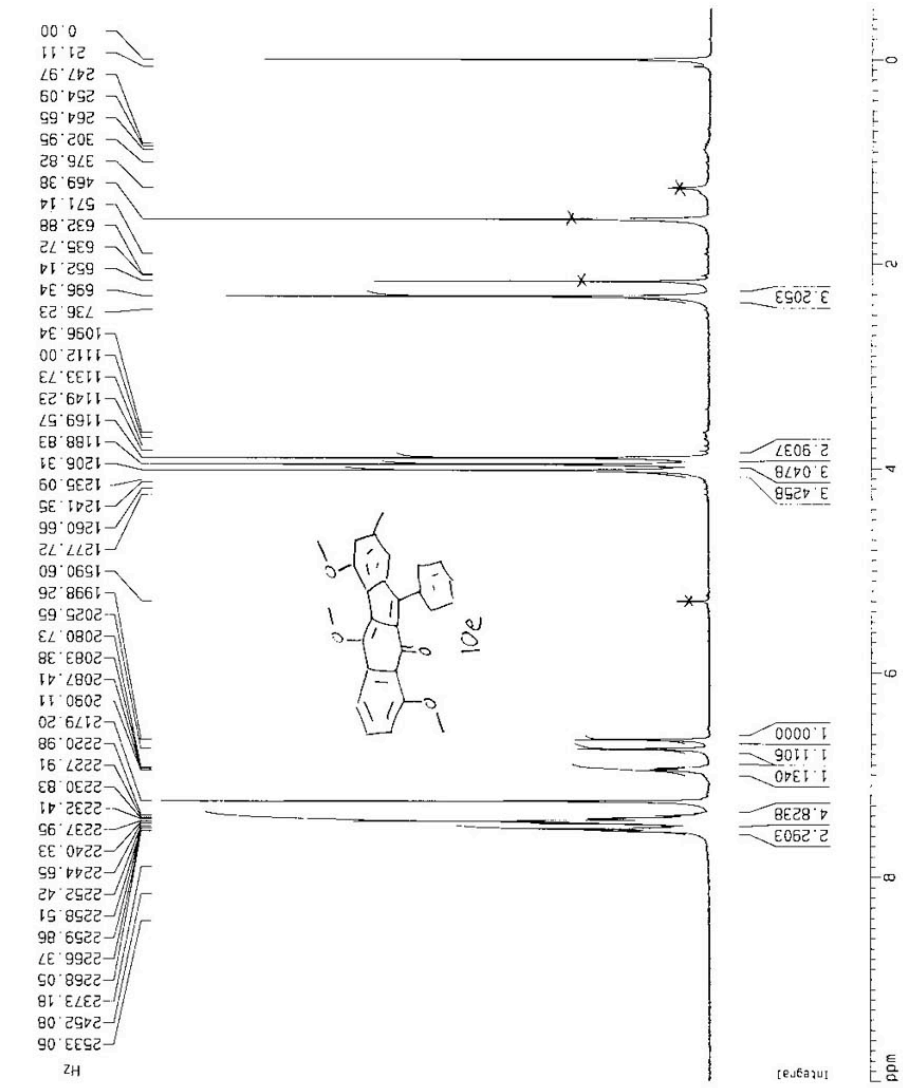

```

Current Data Parameters
NAME      KJE-6-B-05
EXPNO    2
PROCNO   1

F2 - Acquisition Parameters
Date_    20050609
Time     8.29
INSTRUM spect
PROBHD   5 mm Mxline
PULPROG zgpg30
ID       B5355
SOLVENT  DMS-D6
NS       11454
DS       4
SWH      18832.364 Hz
FIDRES   0.267360 Hz
AQ       1.740336 sec
RG       6135
DM       26.856 usec
DE       6.00 usec
TE       300.0 K
D1       2.0000000 sec
d11      0.0300000 sec
d12      0.00002000 sec

***** CHANNEL f1 *****
NUC1     13C
P1       11.80 usec
PL1      0.00 dB
SF01     75.4760200 MHz

***** CHANNEL f2 *****
CPDPRG2  waltz16
NUC2     1H
PCPD2    140.00 usec
PL2      0.00 dB
PL12     17.50 dB
PL13     17.50 dB
SF02     300.1312005 MHz

F2 - Processing parameters
SI       32768
SF       75.4677503 MHz
WDW      EM
SSB      0
LB       1.00 Hz
GB       0
PC       1.40

1D NMR plot parameters
CX       20.00 cm
F1P      200.000 ppm
F2P      15093.50 Hz
F3P      -37.70 ppm
PRGCM    10.02500 Hz/cm
HZCM     755.56421 Hz/cm

```

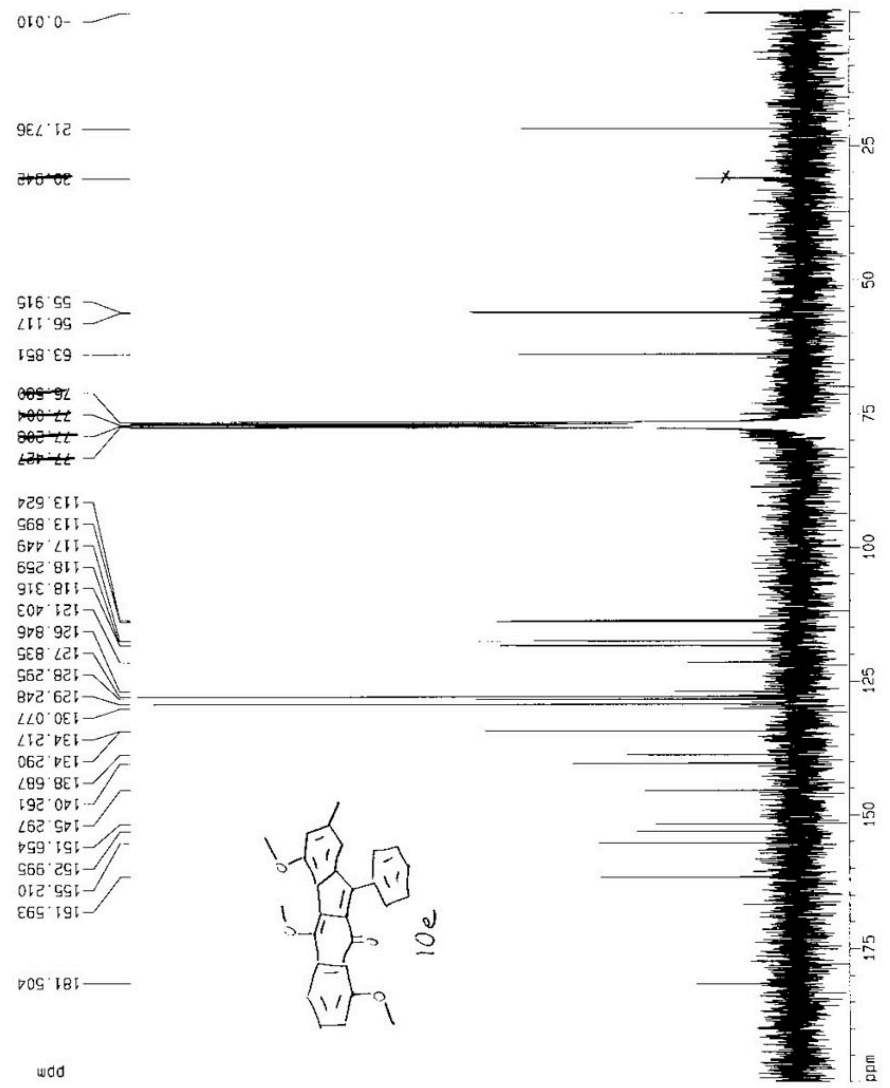



Current Data Parameters  
 NAME: 4J-5-19-05  
 EXPNO: 1  
 PROCNO: 1

F2 - Acquisition Parameters  
 Date\_: 20050519  
 Time: 9:46  
 INSTRUM: spect  
 PROBHD: 5 mm Dui 13  
 PULPROG: zgpg30  
 TC: 32/BB  
 SOLVENT: CDCl3  
 NS: 256  
 DS: 2  
 SWH: 10416.667 Hz  
 FIDRES: 0.317861 Hz  
 AQ: 5.5728740 sec  
 RG: 4096  
 DA: 48.000 usec  
 DE: 66.67 usec  
 TE: 300.0 K  
 L1: 0.05  
 D1: 1.05000000 sec  
 D11: 11.75 usec  
 SFO1: 500.1330885 MHz  
 NUC1EUS: 1H

F2 Processing parameters  
 SI: 15384  
 SF: 500.1330140 MHz  
 WDM: nu  
 SSB: 0  
 GB: 0  
 PC: 1.00

1D NMR plot parameters  
 CX: 20.00 cr  
 F1F: 12.000 ppr  
 F1: 6001.56 Hz  
 F2F: -0.500 ppr  
 F2: -250.07 Hz  
 PPMCM: 0.62400 ppr/cm  
 HZCM: 312.5624 Hz/cm

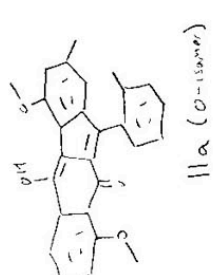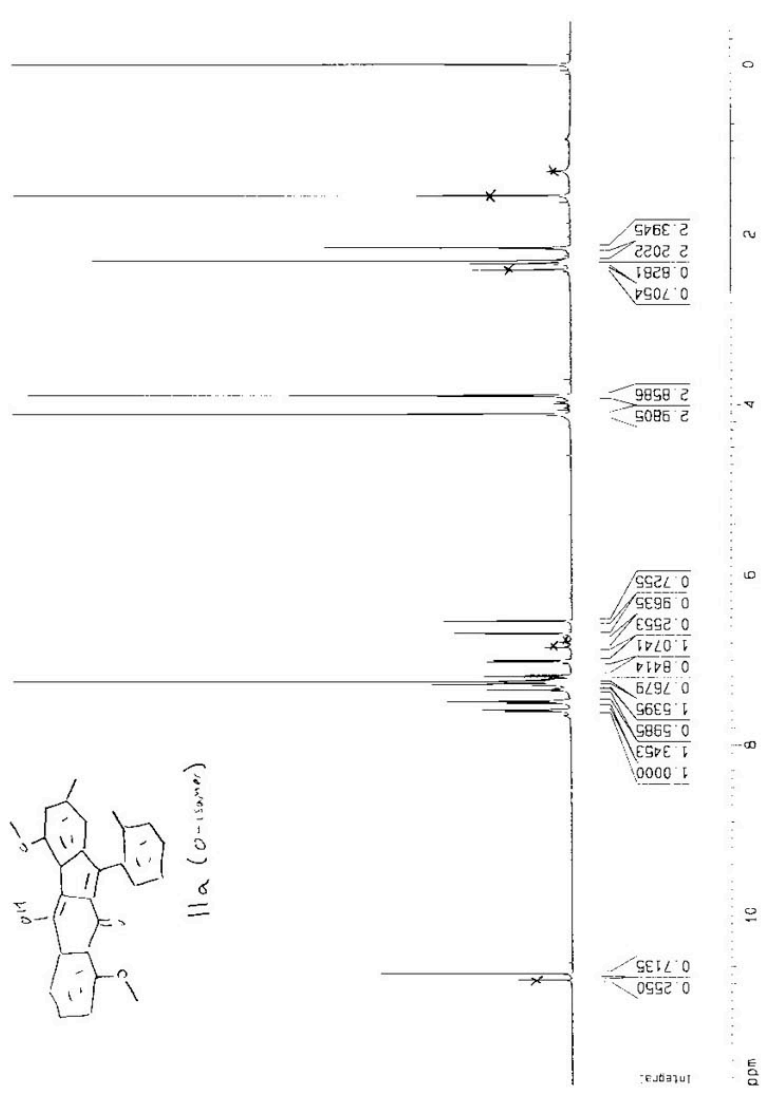

Current Data Parameters  
 NAME: KJ-5-19-05  
 EXPNO: 3  
 PROCNO: 1

F2 - Acquisition Parameters  
 Date\_: 20050519  
 Time: 13:46  
 INSTRUM: spect  
 PROBHD: 5 mm Dual 13  
 PULPROG: zg30  
 TO: 32768  
 SOLVENT: CDCl3  
 NS: 256  
 DS: 2  
 SWH: 10416.667 MHz  
 FIDRES: 0.317851 Hz  
 AQ: 1.5728740 sec  
 RG: 5048  
 DA: 48.000 USEC  
 DE: 88.27 USEC  
 TE: 300.0 K  
 DELT: 0.35  
 D1: 1.0000000 sec  
 S1: 11.75 USEC  
 SFO1: 500.1330985 MHz  
 NUCLEUS: 1H

F2 - Processing parameters  
 SI: 16384  
 SF: 500.1330154 MHz  
 HSI: 1  
 EQ: 0  
 SSF: 0  
 EB: 0  
 GC: 0  
 PC: 1.00

F2 NMR plot parameters  
 CX: 20.00 cr  
 CP: 17.000 ppm  
 F1: 6001.56 Hz  
 F2: -0.520 ppm  
 FZ: 250.07 Hz  
 GAMMA: 0.62600 ppm/cm  
 GZCM: 313.081351 Hz/cm

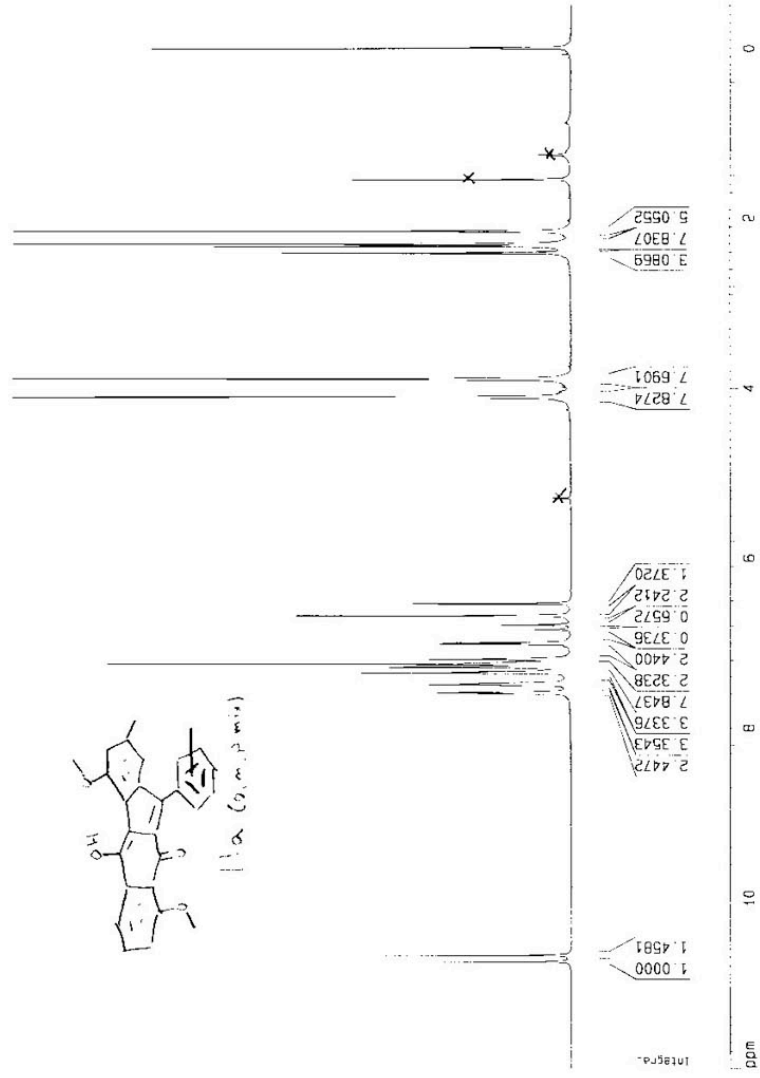

```

Current Data Parameters
NAME      KJE-9-05
EXPNO    6
PROCNO   1

F2 - Acquisition Parameters
Date_    20050610
Time     8:22
INSTRUM spect
PROBHD   5 mm Multino
PULPROG zgpg30
D        B5356
SOLVENT  DMS-D6
NS       10000
DS       4
SFO1     100.625 MHz
SFO2     0.267960 MHz
AQ       1.7400308 sec
RG       65304
DM       26.550 usec
DE       5.00 usec
TE       300.0 K
D1       2.00000000 sec
d11      0.03000000 sec
d12      0.00020000 sec

===== CHANNEL f1 =====
NUC1     13C
P1       11.80 usec
PL1      0.00 dB
SFO1     75.4760200 MHz

===== CHANNEL f2 =====
CPDPRG2  waltz16
NUC2     1H
P2       110.00 usec
PL2      0.00 dB
PL3      17.50 dB
PL13     17.50 dB
SF02     300.1312000 MHz

F2 - Processing parameters
SI       32768
SF       75.4677481 MHz
RG       0
WDW      0
SSB      0
LB       0.00 Hz
GB       0
PC       1.40

ID NMR pict parameters
CX       20.00 cm
CT       200.00000000
F1       100.625 MHz
F2       300.13120000
PPMCM   10.00500000/cm
HZCM    756.56421 MHz/cm

```

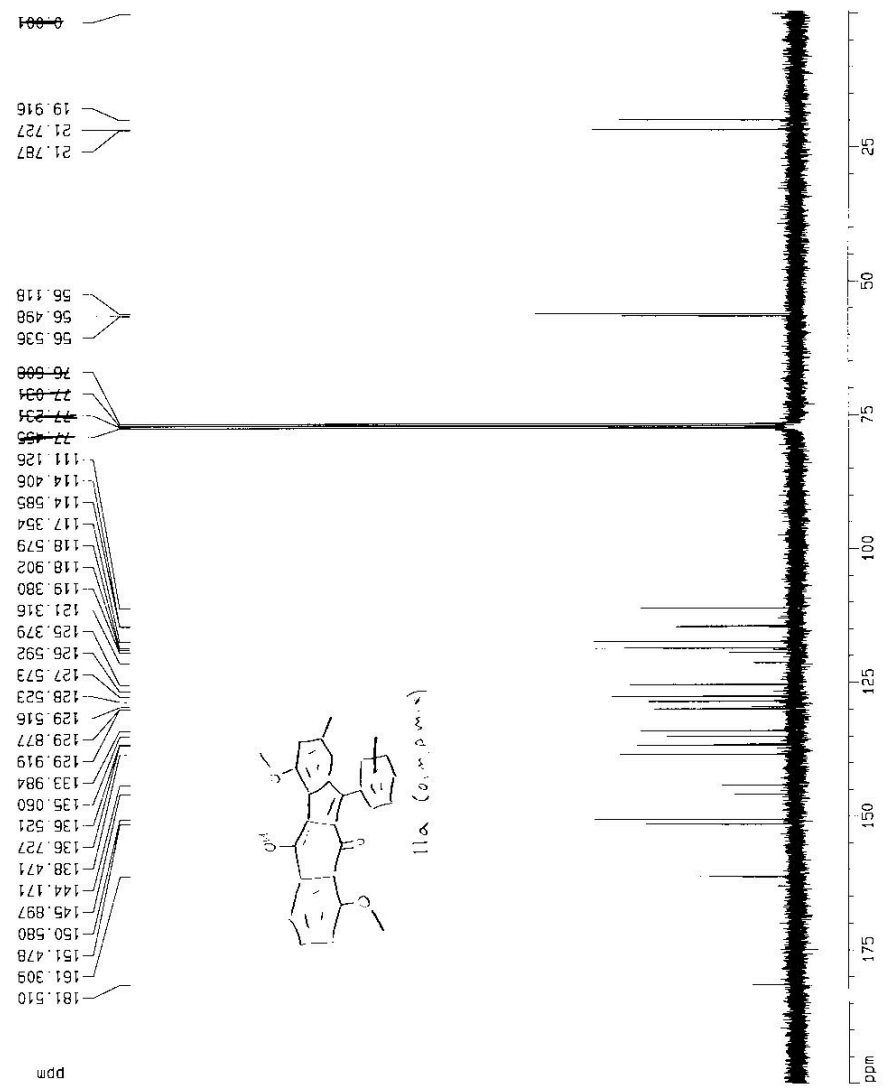

Current Data Parameters  
 NAME KJE-5-1E-05  
 EXPNO 5  
 PROCNO 1

F2 - Acquisition Parameters  
 Date\_ 20050516  
 Time 17:33  
 INSTRUM spect  
 PROBD 5 mm QNP 1H  
 PULPROG zgpg30  
 TC 32756  
 SOLVENT CDCl3  
 NS 64  
 DS 2  
 SWH 10416.657 Hz  
 FIDRES 0.317891 Hz  
 AQ 1.5723740 sec  
 RG 4095  
 CW 48.000 usec  
 DL 68.67 usec  
 TE 300.0 K  
 HL 0 dB  
 O1 1.00000000 sec  
 F1 11.75 usec  
 SF01 500.133085 MHz  
 NUCLEUS 1H

F2 Processing parameters  
 SI 16284  
 S 500.130139 MHz  
 WDM nu  
 SSB 0  
 GB 0  
 PC 1.00

1D NMR plot parameters  
 CX 20.00 cr  
 F/F 17.000 ppm  
 F1 6001.55 Hz  
 F2 -250.07 Hz  
 FWHM 0.87500 ppm/cm  
 FZCM 312.58124 Hz/cm

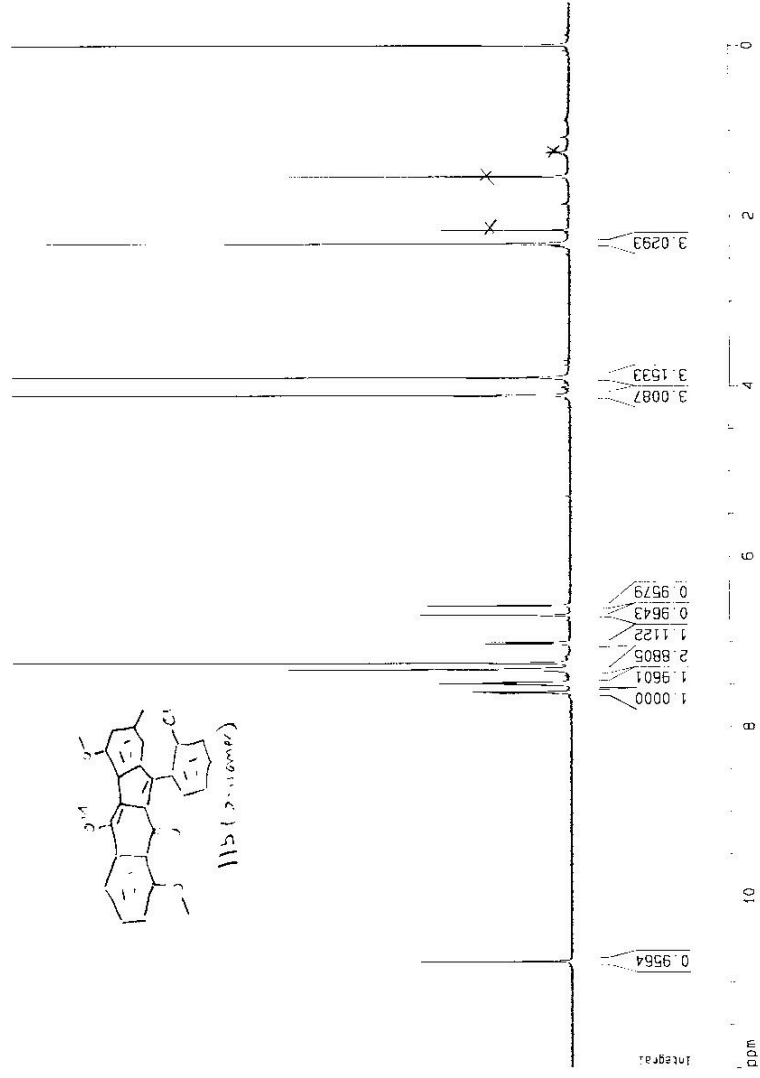

Current Data Parameters  
 NAME 4J-5-16-05  
 EXPNO 1  
 PROCNO 1

F2 - Acquisition Parameters  
 Date\_ 20080516  
 Time 10:01  
 INSTRUM spect  
 PROBHD 5 mm Dual 1:3  
 PULPROG zgpg30  
 TD 7930  
 T2 32768  
 SOLVENT CCL13  
 NS 512  
 DS 2  
 SWH 10416.657 Hz  
 FIDRES 0.314894 Hz  
 AQ 1.5729740 sec  
 RG 4096  
 CW 48.000 usec  
 DE 58.67 usec  
 TE 300.0 K  
 L1 0 dB  
 D1 1.00000000 sec  
 P1 11.75 usec  
 SFO1 500 133085 MHz  
 NUC1 13  
 NUC2 1H

F2 Processing parameters  
 SI 16384  
 SF 500 1300133 MHz  
 NU 1  
 SSF 0  
 LR 0.00 Hz  
 GB 0  
 FC 1.00

1D NMR plot parameters  
 CX 20.00 cm  
 F1 17.000 ppm  
 F2 6001.56 Hz  
 F3 -0.500 ppm  
 F4 250.07 Hz  
 SFO1 6.65900 ppm/Lin  
 FIDM 312.38124 Hz/Lin

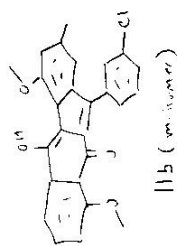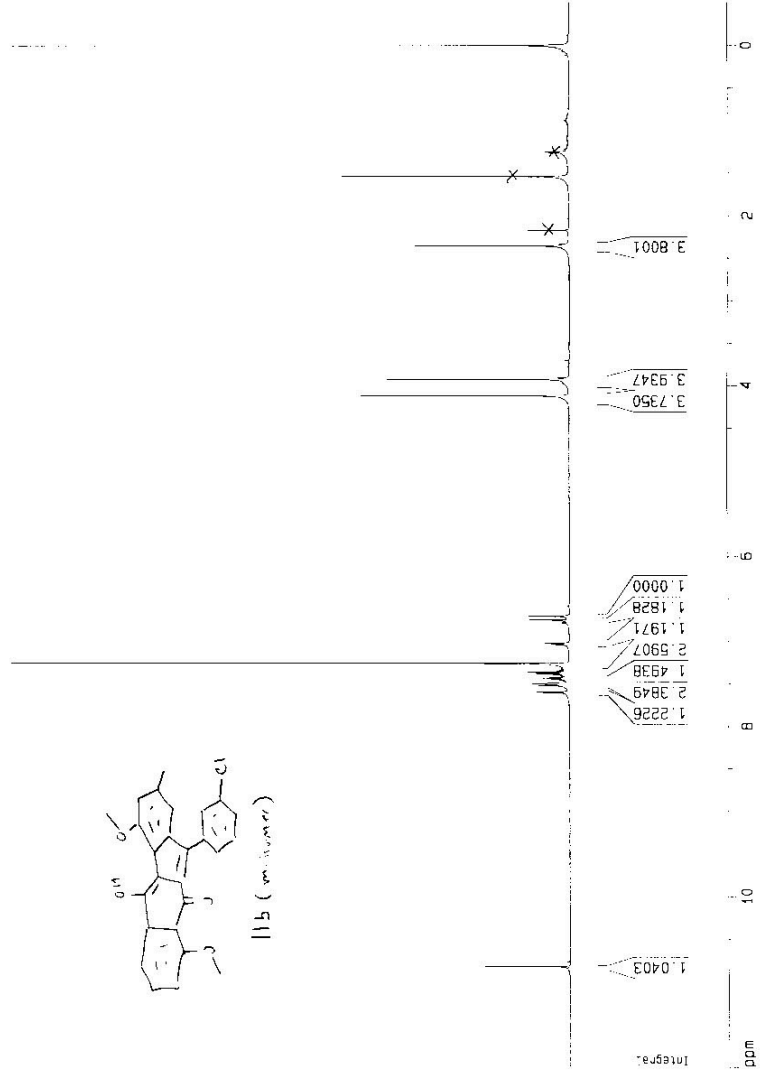

Current Data Parameters  
 NAME 4E-5-13-05  
 EXPNO 1  
 PROCNO 1

F2 - Acquisition Parameters  
 Date\_ 20050513  
 Time 17:16  
 INSTRUM spect  
 PROBHD 5 mm Dui: 11  
 PULPROG zgpg30  
 TC 32768  
 SOLVENT CDCl3  
 NS 512  
 DS 2  
 SWH 10416.657 Hz  
 FIDRES 0.317851 Hz  
 AQ 1.5729740 sec  
 RG 4096  
 CA 48.000 usec  
 CB 68.67 usec  
 TE 300.0 K  
 LC 0.35  
 PC 1.00000000 sec  
 SI 11.75 usec  
 SFO 500.1330885 MHz  
 NUC1EL13 13C

F2 Processing parameters  
 SI 15264  
 SF 500.1330885 MHz  
 WDM 1.00  
 SSB 0  
 GB 0  
 PC 1.00

1D NMR list parameters  
 CX 20.00 cm  
 F1 19.000 ppm  
 F2 -0.500 ppm  
 F3 250.07 Hz  
 DDM 0.62500 ppm/cm  
 F4 312.58124 Hz/cm

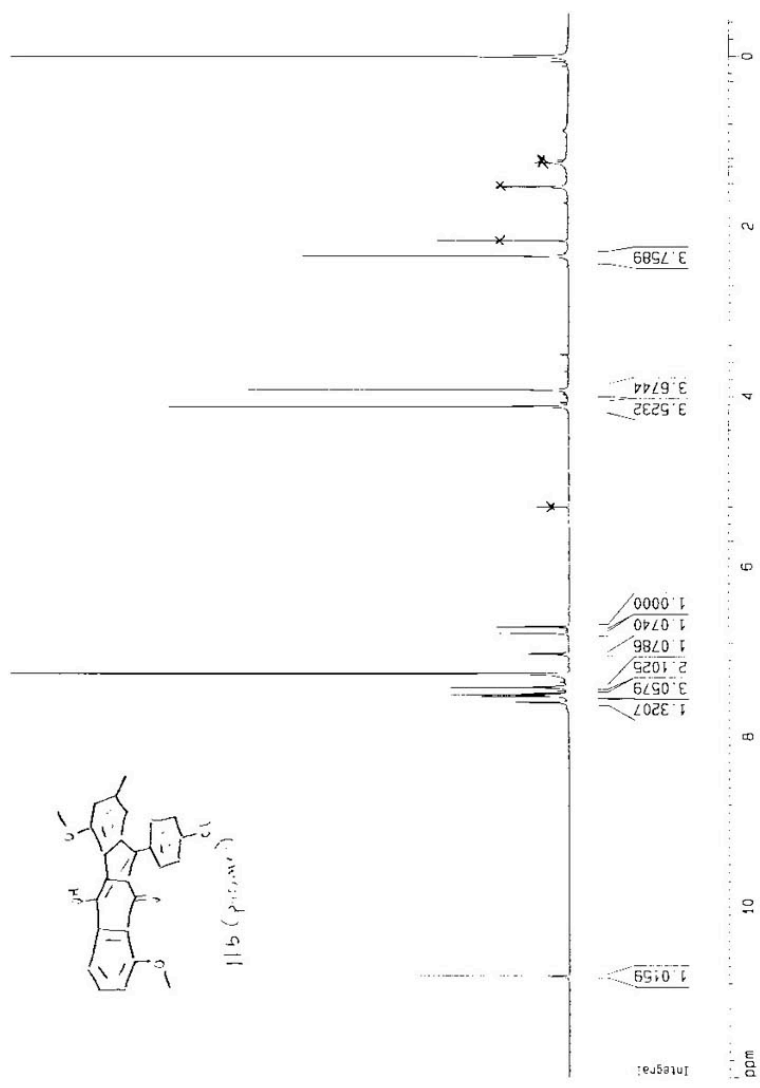

Current Data Parameters  
 NAME KJF-5-17-05  
 EXPNO 8  
 PROCNO 1

F2 - Acquisition Parameters  
 Ch.c. 20090518  
 Time 15:16  
 INSTRUM spect  
 PROBHD 5 mm Dca1 13  
 P1 PRG2 /gpg50  
 T1 SFS36  
 T2 SFS36  
 SOLVENT CDCl3  
 NS 2:71  
 DS ?  
 SM? 4:665,668 Hz  
 FIDRES 0.633783 Hz  
 AQ 0.7954820 sec  
 RG 32768  
 DR 12.000 usec  
 DE 17.14 usec  
 TE 303.2 K  
 L1 0 dB  
 L2  
 L3  
 J1 2.0000000 sec  
 J2  
 J3  
 CDPORG wa.1716  
 P31 120.00 usec  
 S4 55 dB  
 J11 0.0300000 sec  
 SP 21 dB  
 S1 9.79 usec  
 S101 125.75792614 MHz  
 NUCLEUS 13C

F2 Processing Parameters  
 SI 125.757926 MHz  
 SF 27269  
 ADK EN  
 SSB 0  
 RB 1.00 Hz  
 GB 0  
 PC 0.54

1D NMR plot parameters  
 CX 20.00 cr  
 F1F 200.000 pprf  
 S1 25151.5617  
 F2P C 500.00F  
 F2 62.88 Hz  
 GAMMA 13C  
 FWHM 1256.12180117/cm

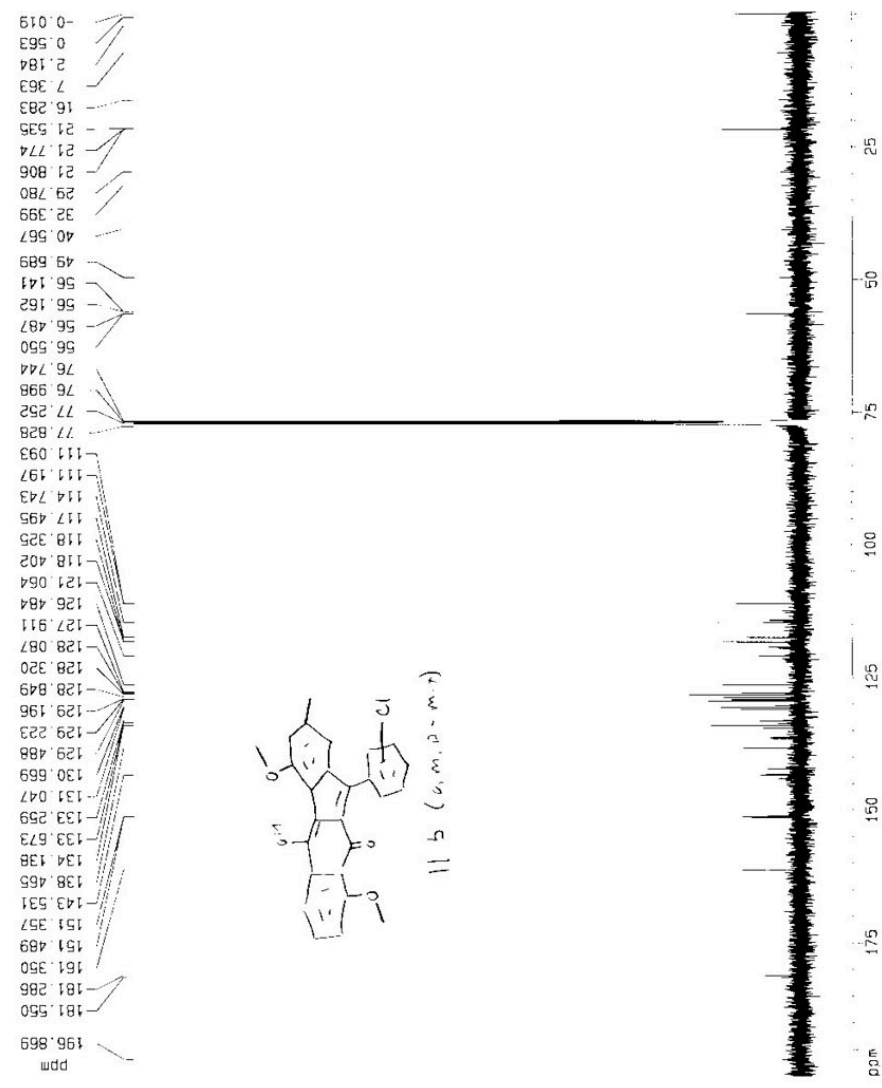

Current Data Parameters  
 NAME KJF-5-05  
 EXPNO 1  
 PROCNO 1

F2 - Acquisition Parameters  
 Date\_ 20050509  
 Time 10:01  
 INSTRUM spect  
 PROBHD 5 mm QNP 13  
 PULPROG zgpg30  
 TD 32768  
 SOLVENT CDCl3  
 NS 1024  
 DS 2  
 SWH 6578.947 Hz  
 FIDRES 0.200774 Hz  
 AQ 2.4904180 sec  
 RG 6192  
 DA 76.000 usec  
 DF 50.00 usec  
 TE 300.0 K  
 HL 0 dB  
 DI 1.0000000 sec  
 P1 11.75 usec  
 SFO1 500.1327644 MHz  
 NUCLEUS 1H

F2 - Processing parameters  
 SI 16384  
 SF 500.1300135 MHz  
 RG 0  
 SSB 0  
 LB 0.00 Hz  
 GB 0  
 PC 1.00

1D NMR plot parameters  
 CX 20.00 cr  
 F1 12.000 ppm  
 F2 6001.55 Hz  
 F3 -0.500 ppm  
 F4 250.07 Hz  
 PPMCM 0.62500 ppm/cm  
 HZCM 312.58124 Hz/cm

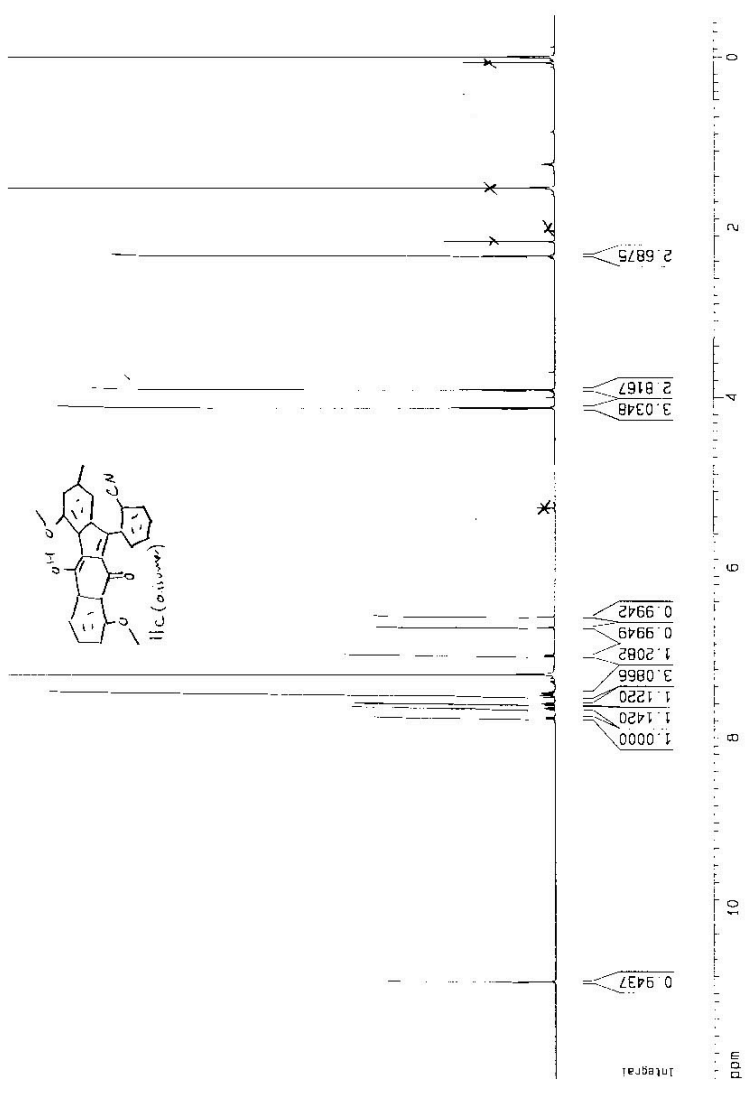



Current Data Parameters  
 NAME KJL-5-7-05  
 EXPNO 1  
 PROCNO 1

F2 - Acquisition Parameters  
 Date\_ 20050507  
 Time 13:11  
 INSTRUM spect  
 PROBD 5 mm Dui1 :3  
 PULPROG zg30  
 TO 32766  
 SOLVENT CDCl3  
 NS 1024  
 DS 2  
 SWH 6578.947 Hz  
 FIDRES 0.200774 Hz  
 AQ 2.4904180 sec  
 RG 61.92  
 DW 76.000 usec  
 DE 95.000 usec  
 TE 300.0 K  
 HL 0 dB  
 D1 1.00000000 sec  
 P1 11.75 usec  
 SFO1 500.1327643 MHz  
 NUCLEUS 1H

F2 - Processing parameters  
 SI 16384  
 SF 500.1300135 MHz  
 WDW no  
 SSB 0  
 LB 0.00 Hz  
 GB 0  
 PC 1.00

1D NMR plot parameters  
 CX 20.00 cm  
 F1 12.000 ppr  
 F1 6001.55 Hz  
 F2 -0.500 ppr  
 F2 -250.07 Hz  
 PPMCM 0.62500 ppr/cm  
 HZCM 312.58124 Hz/cm

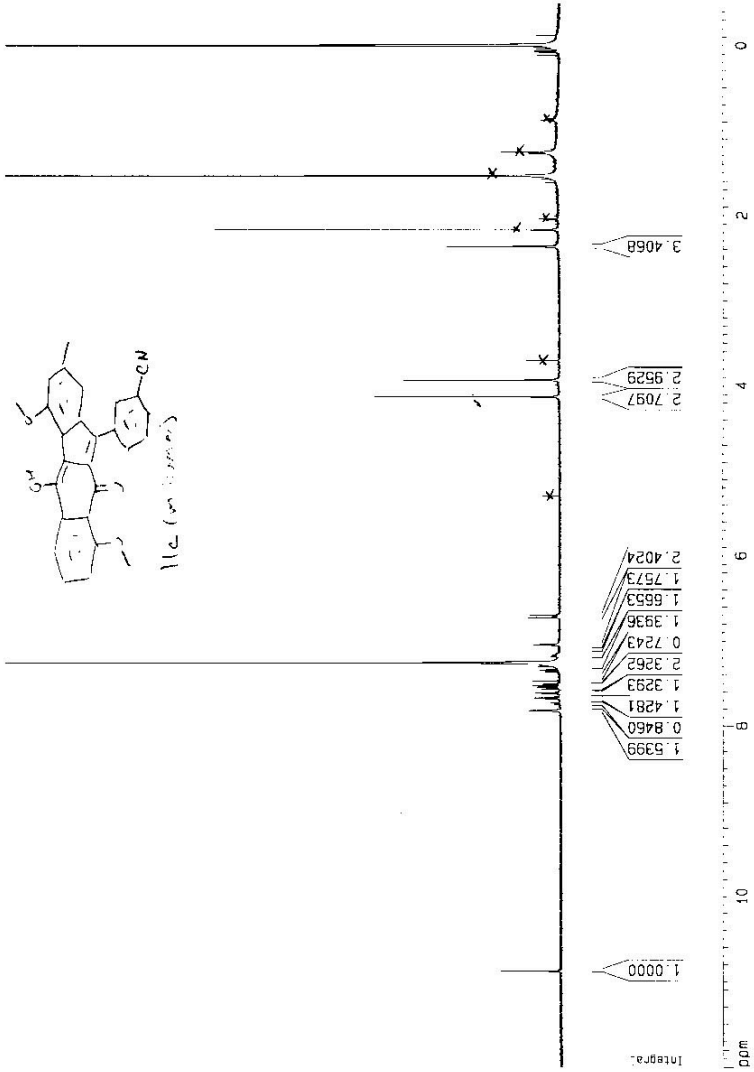

Current Data Parameters  
 NAME KJE662005  
 EXPNO 1  
 PROCNO 1

F2 - Acquisition Parameters  
 Date\_ 20050505  
 Time 13:28  
 INSTRUM spect  
 PROBHD 5 mm QNP 1H  
 PULPROG zgpg30  
 TD 32768  
 SOLVENT CDCl3  
 NS 512  
 DS 2  
 SMH 6493.506 Hz  
 FIDRES 0.158166 Hz  
 AQ 2.5231860 sec  
 RG 8192  
 DM 77.000 usec  
 DE 96.25 usec  
 TE 300.2 K  
 L1 0 dB  
 J1 1.00000000 sec  
 P1 11.75 usec  
 SFO1 300.1327665 MHz  
 NUC1US 1H

F2 Processing parameters  
 SI 16384  
 SF 300.1300135 MHz  
 WDW rh  
 SSB 0  
 LB 0.00 Hz  
 GB 0  
 PC 1.00

1D NMR plot parameters  
 CX 20.00 cm  
 F4P 12.000 ppb  
 F1 6001.95 Hz  
 F2P -0.500 ppb  
 F2 -250.07 Hz  
 PPMCM 0.62500 ppb/cm  
 HZCM 312.56124 Hz/cm

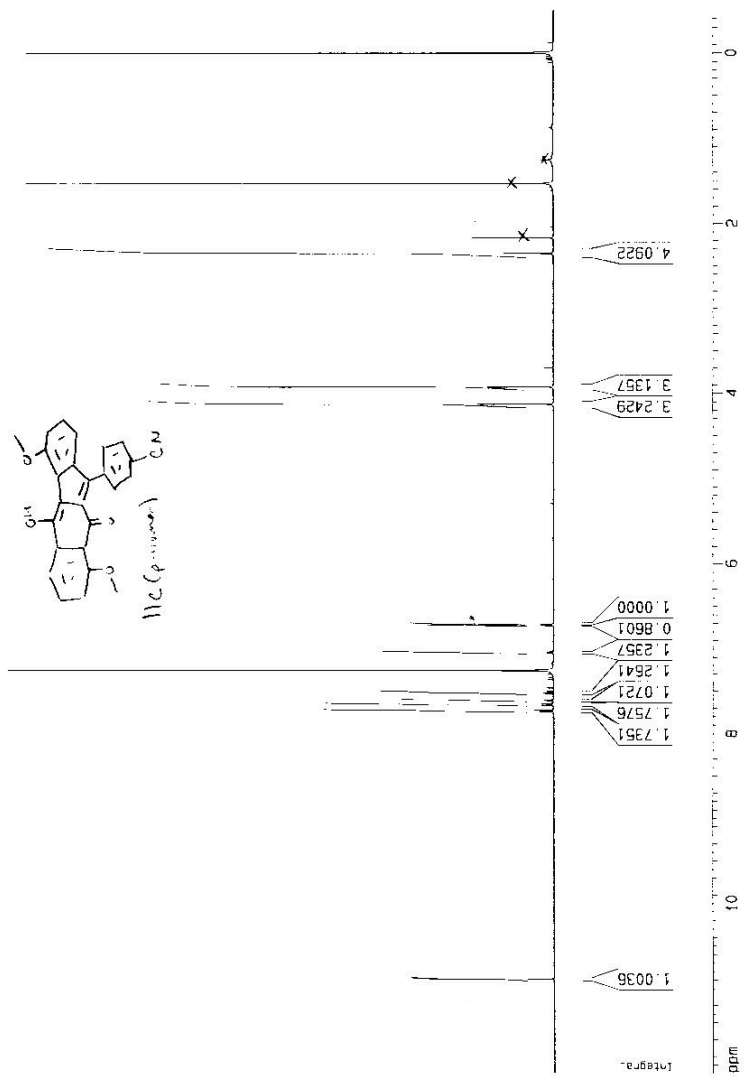

Current Data Parameters  
 NAME: 4JL-5-9-05  
 EXPNO: 4  
 PROCNO: 1

F2 - Acquisition Parameters  
 Date\_: 20050509  
 Time: 15:35  
 INSTRUM: spect  
 PROBD: 5 mm Dual 1H  
 PULPROG: zgpg30  
 TO: 65536  
 SOLVENT: CDCl3  
 NS: 51200  
 DS: 2  
 SWH: 41666.668 Hz  
 FIDRES: 0.635763 Hz  
 AQ: 0.7864820 sec  
 RG: 32768  
 DW: 12.000 usec  
 DE: 17.14 usec  
 TE: 300.0 K  
 HL: 0.98  
 D2: 2.00000000 sec  
 WALTZ16  
 PCPDPRG: waltz16  
 P3: 120.00 usec  
 S4: 55 dB  
 D7: 0.0300000 sec  
 SP: 21 dB  
 P1: 9.79 usec  
 SF01: 125.7736214 MHz  
 NUCLEUS: 13C

F2 Processing parameters  
 SI: 32768  
 SF: 125.757501 MHz  
 AOK: E1  
 SSB: 0  
 LB: 1.00 Hz  
 GB: 0  
 PC: 0.30

1D NMR plot parameters  
 CX: 20.00 cm  
 F1P: 200.000 ppm  
 F1: 25151.59 Hz  
 F2P: -0.500 ppm  
 F2: 62.66 Hz  
 GAMMA: 1.002500 ppm/cm  
 XCDM: 4260.72560 Hz/cm

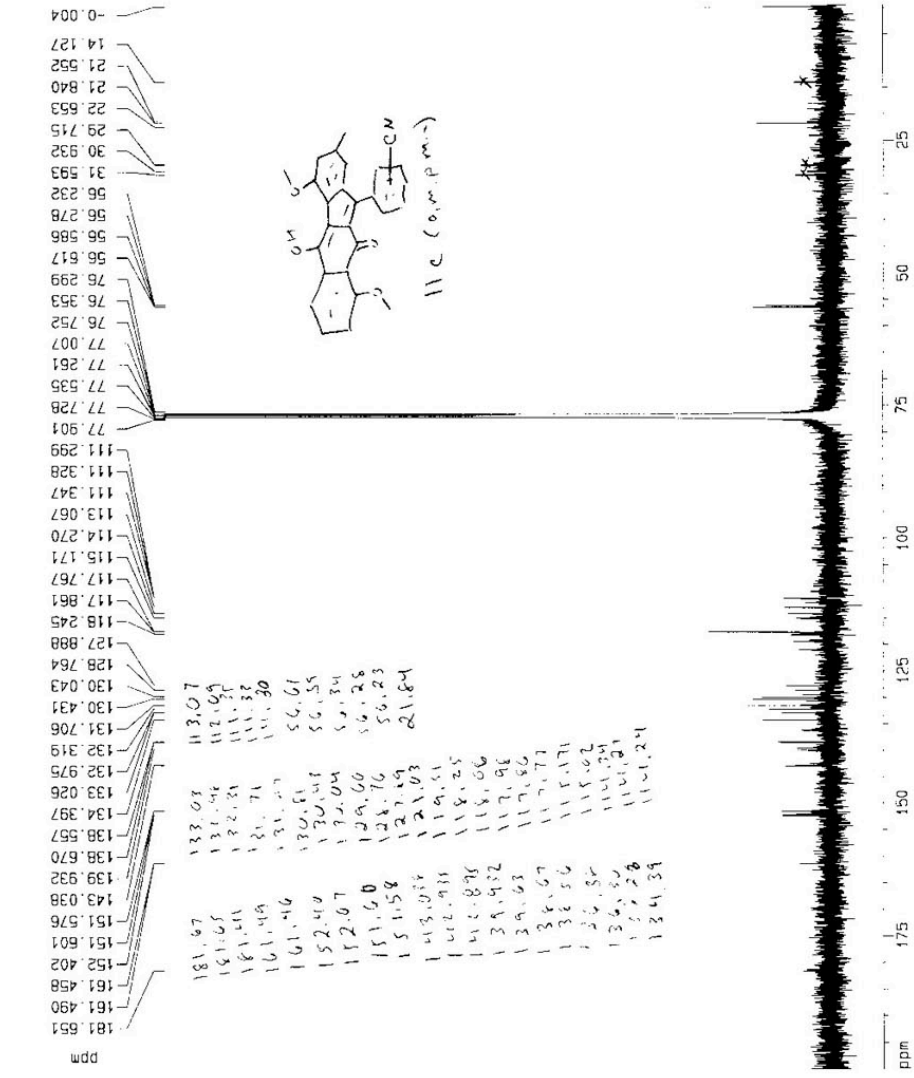

Current Data Parameters  
 NAME: 6J-5-17-05  
 EXPNO: 1  
 PROCNO: 1

F2 - Acquisition Parameters  
 Date\_: 20050517  
 Time: 9:21  
 INSTRUM: spect  
 PROBHD: 5 mm Dbb-13  
 PULPROG: zgpg30  
 T2: 32.768  
 SOLVENT: DMS-D6  
 NS: 128  
 DS: 2  
 SWH: 10416.667 Hz  
 FIDRES: 0.31785 Hz  
 AQ: 1.5729140 sec  
 RG: 2048  
 DW: 48.000 usec  
 DE: 68.0 usec  
 TE: 300.0 K  
 HL: 0 dB  
 DI: 1.00000000 sec  
 P1: 11.75 usec  
 SFO1: 500.1330885 MHz  
 NUC1EUS: 1H

F2 Processing parameters  
 SI: 16384  
 SF: 500.130044 MHz  
 WCW: no  
 SSB: 0  
 GB: 0  
 PC: 1.00

1D NMR plot parameters  
 CX: 20.00 cm  
 C1P: 12.000 ppm  
 F1: 600.156 Hz  
 F2P: -0.500 ppm  
 F2: 250.07 Hz  
 SFOCM: 0.67800 ppm/cm  
 HZCM: 112.98124 Hz/cm

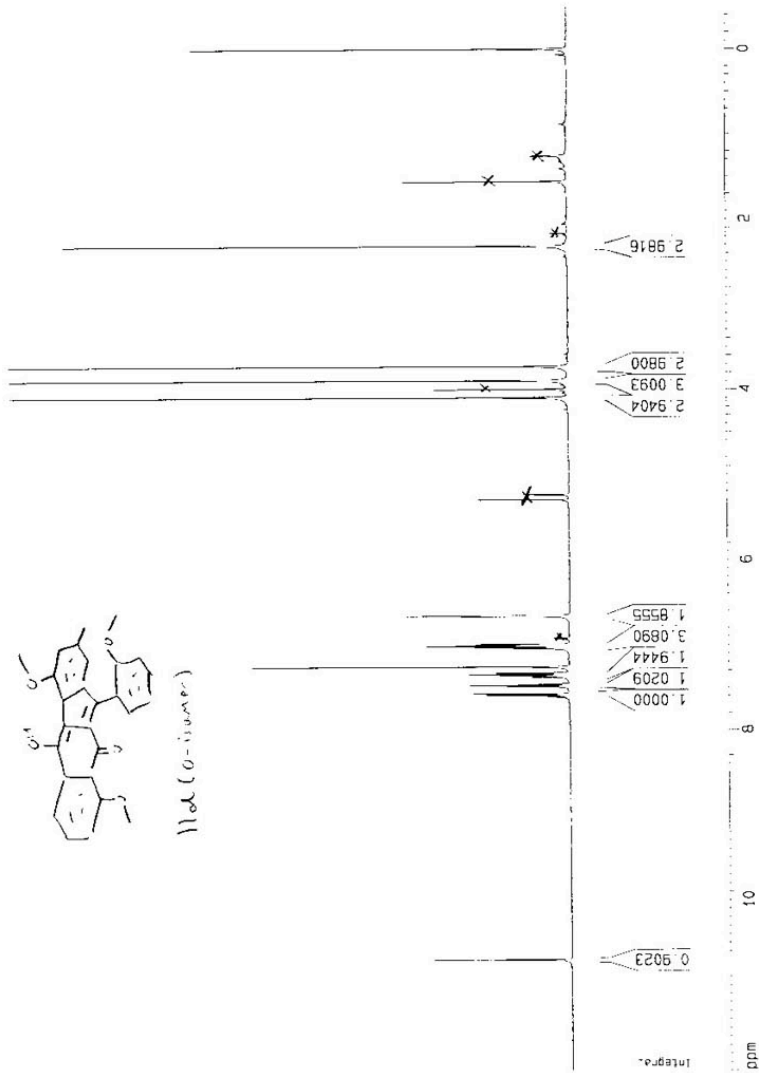

Current Data Parameters  
 NAME: 4U-5 17-05  
 EXPNO: 2  
 PROCNO: 1

F2 - Acquistion Parameters  
 Date\_ : 20090517  
 Time : 11.05  
 INSTRUM : spect  
 PROCNO : 13  
 F1 FREQ : 799930  
 TC : 65536  
 SOLVENT : CDCl3  
 NS : 6045  
 DS : 2  
 SWH : 41686.688 Hz  
 FIDRES : 0.835462 Hz  
 AQ : 0.7864820 sec  
 SFO : 32768  
 DQ : 12.000 USEC  
 ZF : 17.74 USEC  
 TE : 300.0 K  
 L1 : 0 dB  
 C2 : 2.00000000 sec  
 C3 : 1.776  
 P1 : 120.00 USEC  
 S4 : 55 dB  
 D11 : 0.0300000 sec  
 S5 : 21 dB  
 P4 : 5.79 USEC  
 SFO1 : 125.738274 MHz  
 NUCLEUS : 13C

F2 Processing Parameters  
 SI : 32768  
 SF : 125.7573826 MHz  
 RM : EM  
 SSB : 0  
 GC : 1.00 Hz  
 BA : 0  
 PC : 1.40

13C NMR pint parameters  
 CX : 20.00 cm  
 F1P : 240.000 ppm  
 F1 : 25151.56 Hz  
 F2P : 0.500 ppm  
 F2 : -52.88 Hz  
 GAMMA : 0.02900 ppm/cm  
 ZCEN : 2560.72180 Hz/cp

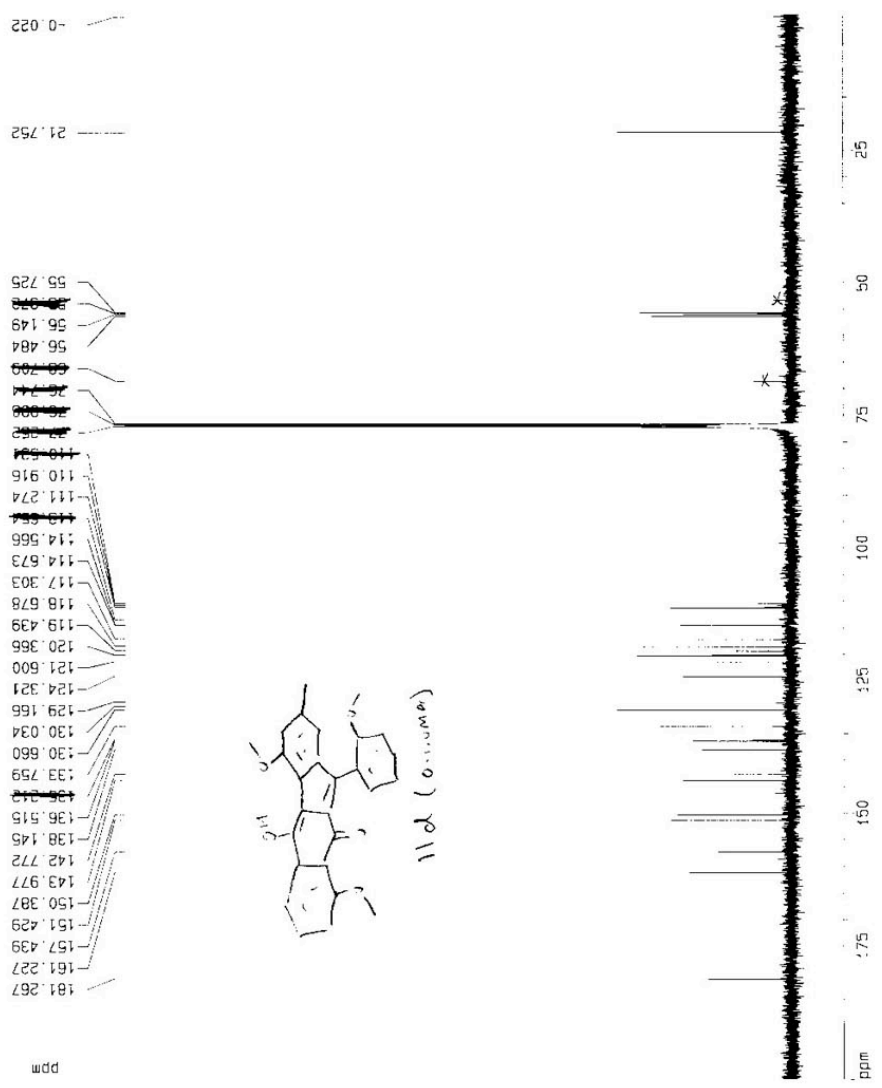









Current Data Parameters  
 NAME KUL-5-11-05  
 EXPNO 2  
 PROCNO 1  
 F2 - Acquisition Parameters  
 Date\_ 20050511  
 Time 11.02  
 INSTRUM spect  
 PROBHD 5 mm Dual 13  
 PULPROG zgpg30  
 TD 65536  
 SOLVENT CDCl3  
 NS 4228  
 DS 2  
 SWH 41666.668 Hz  
 FJDRS 0.635783 Hz  
 AQ 0.7864820 sec  
 RG 32768  
 DW 12.000 usec  
 DE 17.14 usec  
 TE 300.0 K  
 HL 0 dB  
 D1 2.00000000 sec  
 waltz16  
 CPDPRG 120.00 usec  
 S4 55 dB  
 D2 0.0300000 sec  
 S2 21 dB  
 P1 9.79 usec  
 SF01 125.7736214 MHz  
 NUCLEUS 13C  
 F2 - Processing parameters  
 SI 32768  
 SF 125.7577926 MHz  
 WDW EM  
 SSB 0  
 LB 1.00 Hz  
 GB 0  
 PC 1.40  
 ID NMR o1ct parameters  
 CX 20.00 cm  
 F1 200.000 ppm  
 F2 25151.56 Hz  
 F2P -0.500 ppm  
 F2 -62.88 Hz  
 F2MCM 10.02500 ppm/cm  
 F2CM -280.72160 Hz/cm

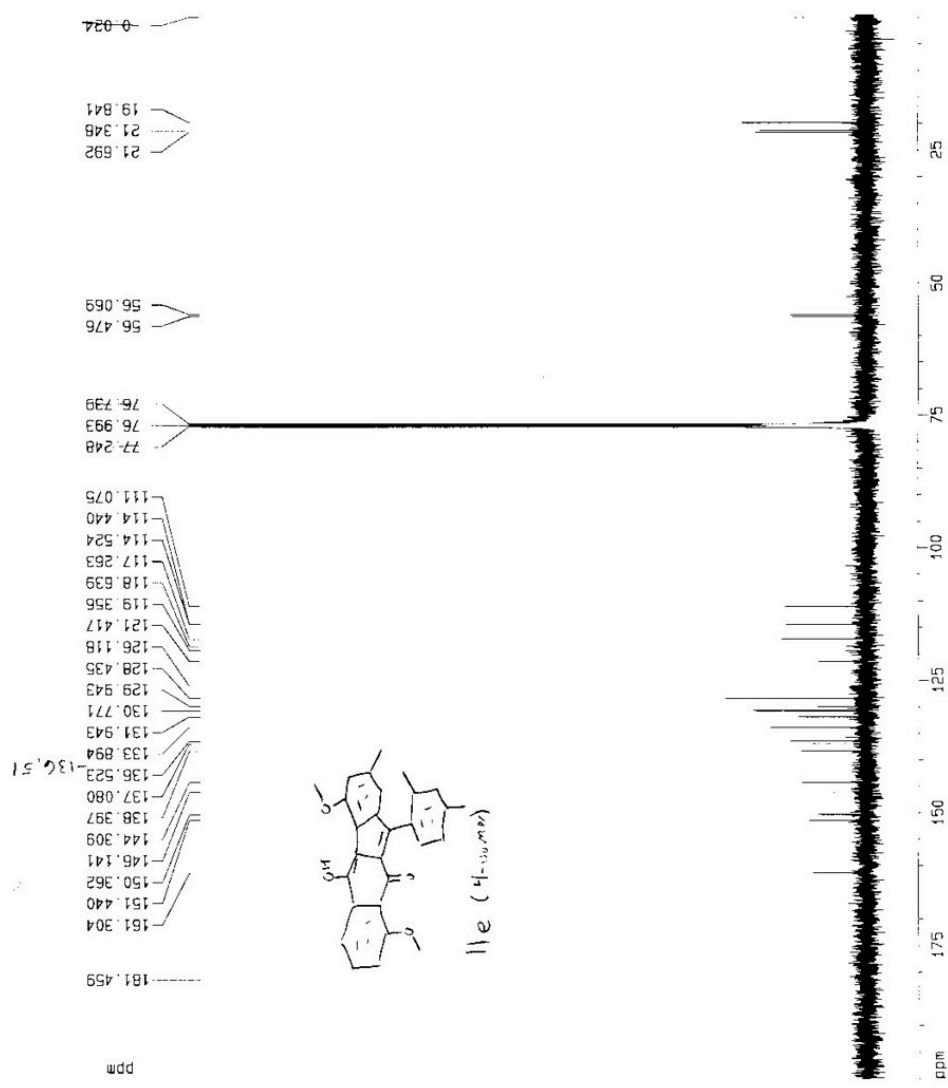

Current Data Parameters  
 NAME ALI-5-11-05  
 EXPNO 5  
 PROCNO 1

F2 - Acquisition Parameters  
 Date\_ 20050511  
 Time 15:35  
 INSTRUM spect  
 PROBRD 5 mm DLG1.13  
 PULPROG zg30  
 TD 32768  
 SOLVENT DMS-D6  
 NS 256  
 DS 2  
 SMH 10416.667 Hz  
 FIDRES 0.317891 Hz  
 AQ 1.5729540 sec  
 RG 2048  
 DM 48.000 usec  
 DE 68.5/ usec  
 TE 300.2 K  
 NL 0 dB  
 SI 1.00000000 sec  
 P1 11.75 usec  
 ST01 500.1330065 MHz  
 NUCLEUS 1H

F2 - Processing parameters  
 SI 16384  
 SF 500.1300145 MHz  
 WDW no  
 SSB 0  
 LB 0.00 Hz  
 GB 0  
 PC 1.00

1D NMR plot parameters  
 CX 20.00 cm  
 F1F 12.000 ppm  
 F1 6001.56 Hz  
 F2F -0.500 ppm  
 F2 250.07 Hz  
 PPM0M 0.82500 ppm/cm  
 HZ0M 312.88124 Hz/cm

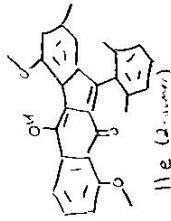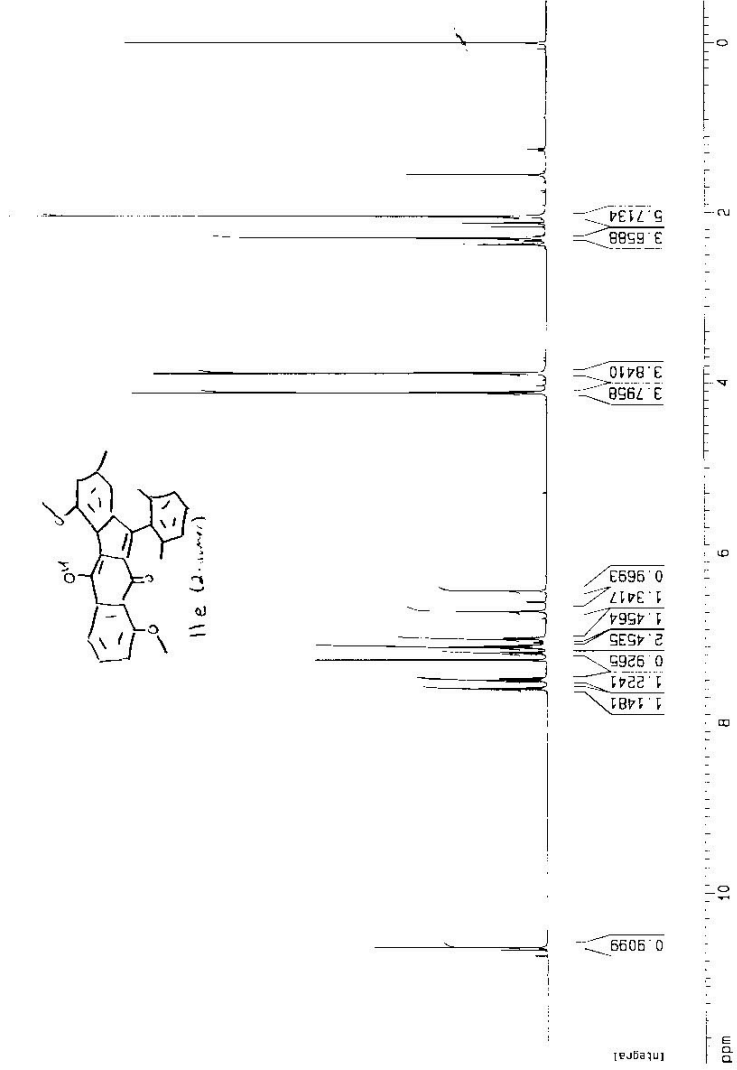

Current Data Parameters  
 NAME KJL-5-11-05  
 EXPNO 6  
 PROCNO 1

F2 - Acquisition Parameters  
 Date\_ 20050511  
 Time 16:37  
 INSTRUM spect  
 P-DBHD 5 mm QNP-1H  
 P1 PRG zgpg30  
 T1 85596  
 SOLVENT CDCl3  
 NS 23159  
 DS 2  
 SWH 41866.668 Hz  
 FIDRES 0.635783 Hz  
 AQ 0.7864620 sec  
 RG 32769  
 DM 12.000 usec  
 DE 17.14 usec  
 TE 300.0 K  
 L1 0 dB  
 J1 2.0000000 sec  
 CDPRG waltz16

P31 120.00 usec  
 S4 55 dB  
 D1 0.0300000 sec  
 S2 21 dB  
 P 5.79 usec  
 SF01 125.7736214 MHz  
 NUCLEUS 13C

F2 Processing parameters  
 SI 32768  
 SF 125.757926 MHz  
 KW EM  
 SSB 0  
 LB 1.00 Hz  
 GB 0  
 PC 1.40

1D NMR plot parameters  
 CX 20.00 cm  
 F1P 200.000 ppm  
 F1 25151.561 Hz  
 F2P 0.500 ppm  
 F2 62.88 Hz  
 DNMCH 10.02500 ppm/cm  
 1/DM 1260.72180 Hz/cm

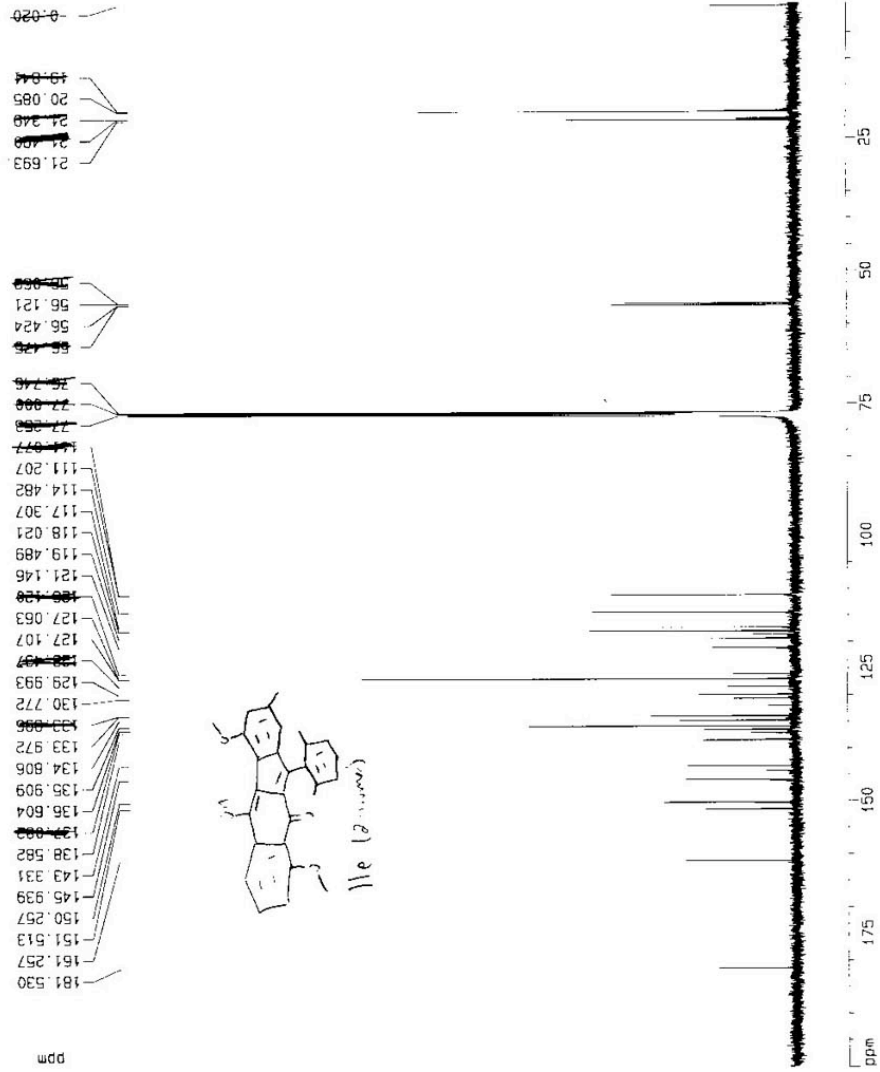

Current Data Parameters  
 NAME KJF-5-26-05  
 EXPNO 1  
 PROCNO 1

F2 - Acquisition Parameters  
 Date\_ 20050526  
 Time 12:21  
 INSTRUM spect  
 PROBHD 5 mm Dual 13  
 PULPROG zgpg30  
 T2 32766  
 SOLVENT CDCl3  
 NS 512  
 DS 2  
 SWH 10415.647 Hz  
 FIDHLS 0.317801 Hz  
 AQ 1.5729140 sec  
 RG 1024  
 DM 48 000 usec  
 DE 58.57 usec  
 TE 300.0 K  
 RL1 0 dB  
 D1 1.0000000 sec  
 P1 11.75 usec  
 SFO1 500.1330885 MHz  
 NUCLEUS 1H

F2 Processing parameters  
 SI 16384  
 SF 500.1300164 MHz  
 MDW no  
 SSB 0  
 LB 0.00 Hz  
 GB 0  
 PC 1.00

1D NMR list parameters  
 CX 20.00 cm  
 F1F 12.000 ppm  
 F1 6001.56 Hz  
 F2F 0.500 ppm  
 F2 250.07 Hz  
 SFO1 0.62500 ppm/cm  
 F2CM 312.58124 Hz/cm

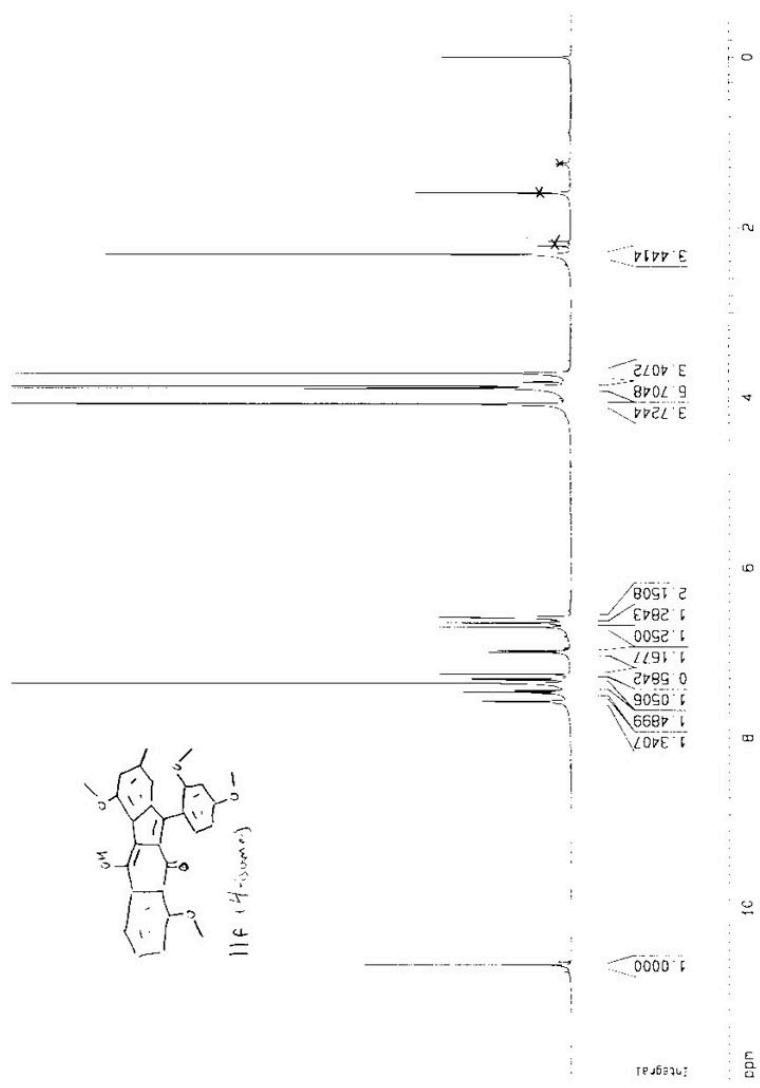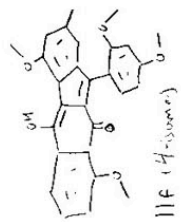

Current Data Parameters  
 NAME: 5-26-05  
 EXPNO: 2  
 PROCNO: 1

F2 - Acquis. Parameters  
 Date\_: 20050527  
 Time: 0:14  
 INSTRUM: spect  
 PROBHD: 5 mm QNP 1H/13  
 PULPROG: zgpg30  
 TD: 65536  
 SOLVENT: CDCl3  
 NS: 31458  
 DS: 2  
 SWH: 41566.668 Hz  
 FIDRES: 0.635783 Hz  
 AQ: 0.7864820 sec  
 RG: 32768  
 DW: 12.000 usec  
 DE: 17.14 usec  
 TE: 300.0 K  
 L1: 0.05  
 C1: 2.0000000 sec  
 C2: 1.1716  
 C3: 120.00 usec  
 SFO1: 0.0300000 sec  
 SFO2: 21.03  
 SFO3: 9.79 usec  
 SFO4: 128.735214 MHz  
 NUC1: 13C

F2 Processing Parameters  
 SI: 32768  
 SF: 125.757539 MHz  
 KCM: EM  
 SSB: 0  
 LB: 1.00 Hz  
 GB: 0  
 PC: 0.50

ID NMR plot parameters  
 CX: 20.00 cm  
 FWH: 200.000 bar  
 F1: 25151.56 Hz  
 F2: 0.500 bar  
 F3: 62.88 Hz  
 PPMCK: 10.00000 ppm/CM  
 Y1CM: 1250 /2152 Hz/cm

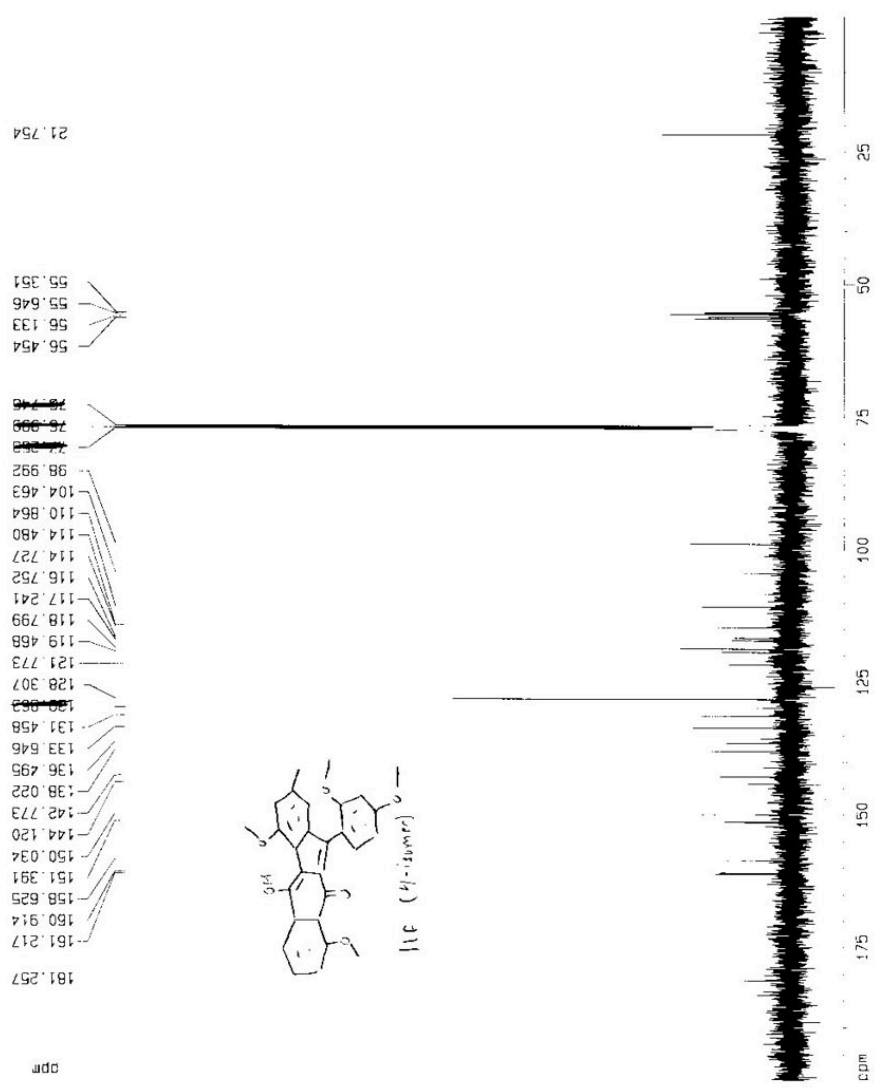



Current Data Parameters  
 NAME 4J-B-10-05  
 EXPNO 2  
 PROCNO 1

F2 - Acquisition Parameters  
 Date\_ 20080610  
 Time 0.25  
 INSTRUM spect  
 PULPROG 5 mm Dual 13  
 TD 65536  
 SOLVENT C3CL3  
 NS 53056  
 DS 2  
 SWH 41665.658 Hz  
 FIDRES 0.635763 Hz  
 AQ 0.7964820 sec  
 RG 32768  
 CM 12.000 usec  
 SFO 171.4 usec  
 TE 300.0 K  
 FL 0.00  
 D1 2.0000000 sec  
 CDPORG null716  
 SFO 120.00 usec  
 SA 55.00  
 D11 0.0300000 sec  
 SP 21.00  
 P1 9.79 usec  
 SF01 125.736214 MHz  
 NUCLEUS 13C

F2 - Processing parameters  
 SI 32768  
 SF 125.7571676 MHz  
 XQM EM  
 SSB 0  
 LB 1.00 Hz  
 GB 0  
 PC 1.40

1D NMR plot parameters  
 CX 20.00 cm  
 F1F 260.000 ppm  
 F1 25151.56 Hz  
 F2F -0.500 ppm  
 F2 52.88 Hz  
 PPKCM 10.07500 ppm/cm  
 HZ/KM 260.72160 Hz/cm

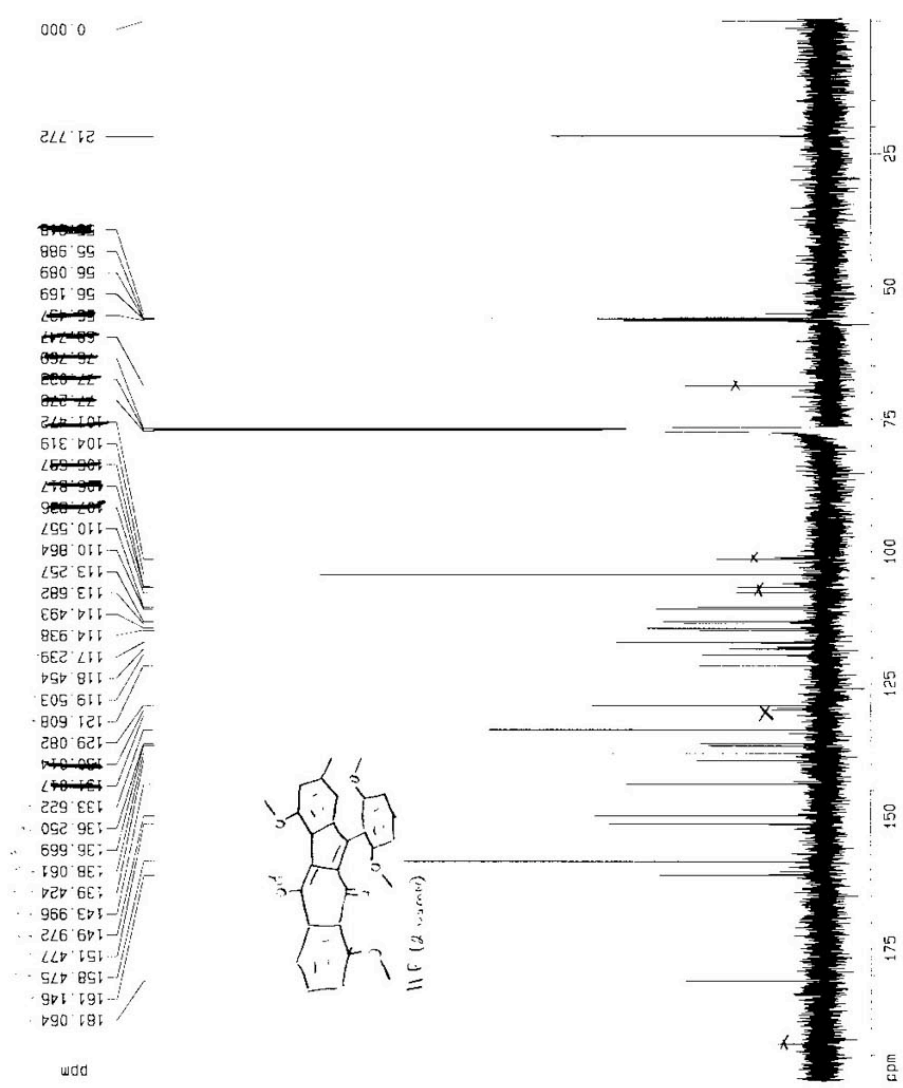

Current Data Parameters  
 NAME Kuf-5-12-05  
 EXPNO 1  
 PROCNO 1

F2 - Acquisition Parameters  
 Date\_ 20050512  
 Time 10:04  
 INSTRUM spect  
 PROBR0 31  
 PULPROG zgpg30  
 TD 32768  
 SOLVENT c3cl3  
 NS 256  
 DS 2  
 SWH 104416.667 Hz  
 FIDRES 0.31781 Hz  
 AQ 1.5729140 sec  
 RG 4096  
 DM 48.000 usec  
 DQ 68.67 usec  
 TE 300.0 K  
 HL 0 dB  
 GC 1.0000000 sec  
 FI 11.75 usec  
 SFO1 500.1330885 MHz  
 NUC1E15 13C

F2 Processing Parameters  
 SI 16384  
 SF 500.1300132 MHz  
 WCW 0  
 SSB 0  
 GB -3  
 PC 1.00

1D NMR list parameters  
 CX 20.00 cm  
 F1 12.000 ppm  
 F1 6001.56 Hz  
 F2 -0.500 ppm  
 F2 250.07 Hz  
 PPMCM 0.62500 ppm/cm  
 HZ/CM 312.58162 Hz/cm

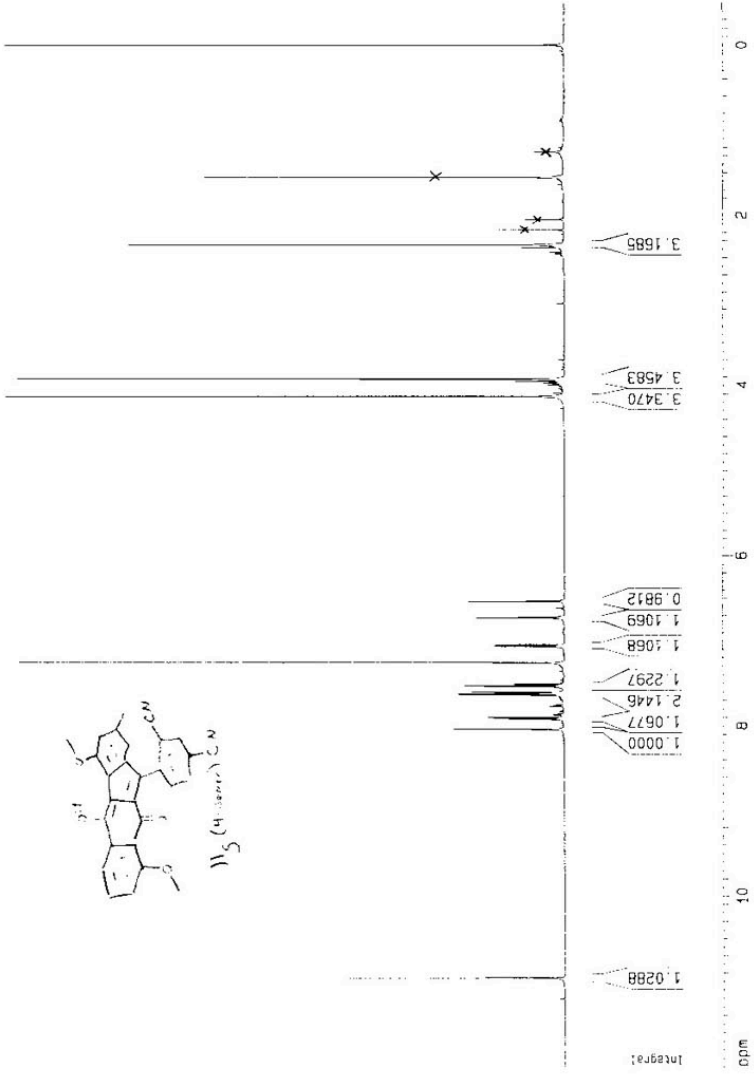



Current Data Parameters  
 NAME KJE-5-12-05  
 EXNO 2  
 PROCNO 1

F2 - Acquisition Parameters  
 Date\_ 20050512  
 Time 11.46  
 INSTRUM spect  
 PULPROG zgpg30  
 5 mm QNPc 13  
 T2 490950  
 T2 65536  
 SOLVENT DMS  
 NS 2370  
 DS 2  
 SWH 41666.668 Hz  
 FIDRES 0.635763 Hz  
 AQ 0.7664820 sec  
 RG 32768  
 DM 12.000 usec  
 DT 17.74 usec  
 TE 300.0 K  
 L-1 0.03  
 P1 7.0000000 sec  
 P2 120.00 usec  
 P3 120.00 usec  
 P4 55.03  
 D1 0.0300000 sec  
 D2 21.03  
 P5 9.79 usec  
 SFO1 125.735214 MHz  
 NUCLEUS 13C

F2 Processing parameters  
 SI 32768  
 SF 125.735214 MHz  
 ACQ EM  
 SSB 0  
 LB 1.00 Hz  
 GB 0  
 PC 1.40

1D NMR plot parameters  
 CX 20.00 cm  
 F1 200.000 ppm  
 F2 25151.56 Hz  
 F2P 0.500 ppm  
 F2 -62.68 Hz  
 PPMCM 10.02500 ppm/cm  
 HZCM 1260.72180 Hz/cm

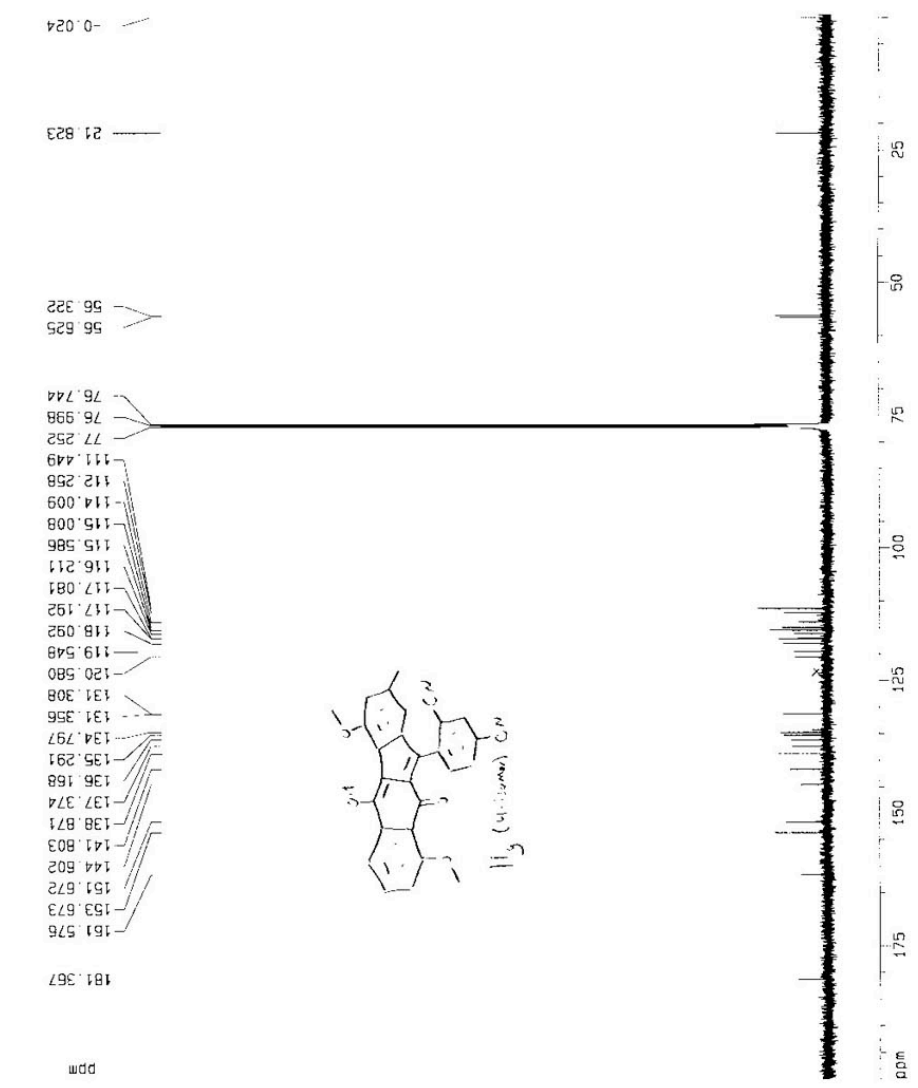

Current Data Parameters  
 NAME: SLE-5-12-05  
 EXPNO: 6  
 PROCNO: 1

F2 - Acquisition Parameters

Date\_: 20050512  
 Time: 17.13  
 INSTRUM: spect  
 PROBHD: 5 mm QNP 1H  
 PULPROG: zgpg30  
 TD: 32768  
 SOLVENT: CDCl3  
 NS: 256  
 DS: 2  
 SWH: 10415.867 Hz  
 FIDRES: 0.317851 Hz  
 AQ: 1.572640 sec  
 RG: 4096  
 DA: 48.000 usec  
 DE: 66.57 usec  
 TE: 300.0 K  
 HL: 0.05  
 D1: 1.00000000 sec  
 F2: 11.75 usec  
 SFO1: 500.1320865 MHz  
 NUC1: 1H

F2 Processing parameters  
 SI: 16384  
 SF: 500.1300134 MHz  
 MZM: 0  
 SSB: 0  
 B: 0.00 Hz  
 BB: 0  
 PC: 1.00

1D NMR plot parameters  
 CX: 20.00 cm  
 F1P: 17.000 ppm  
 F1: 6621.55 Hz  
 F2P: -0.550 ppm  
 F2: -290.07 Hz  
 C13CM: 0.82800 ppm/cm  
 M1CM: 314.06167 Hz/cm

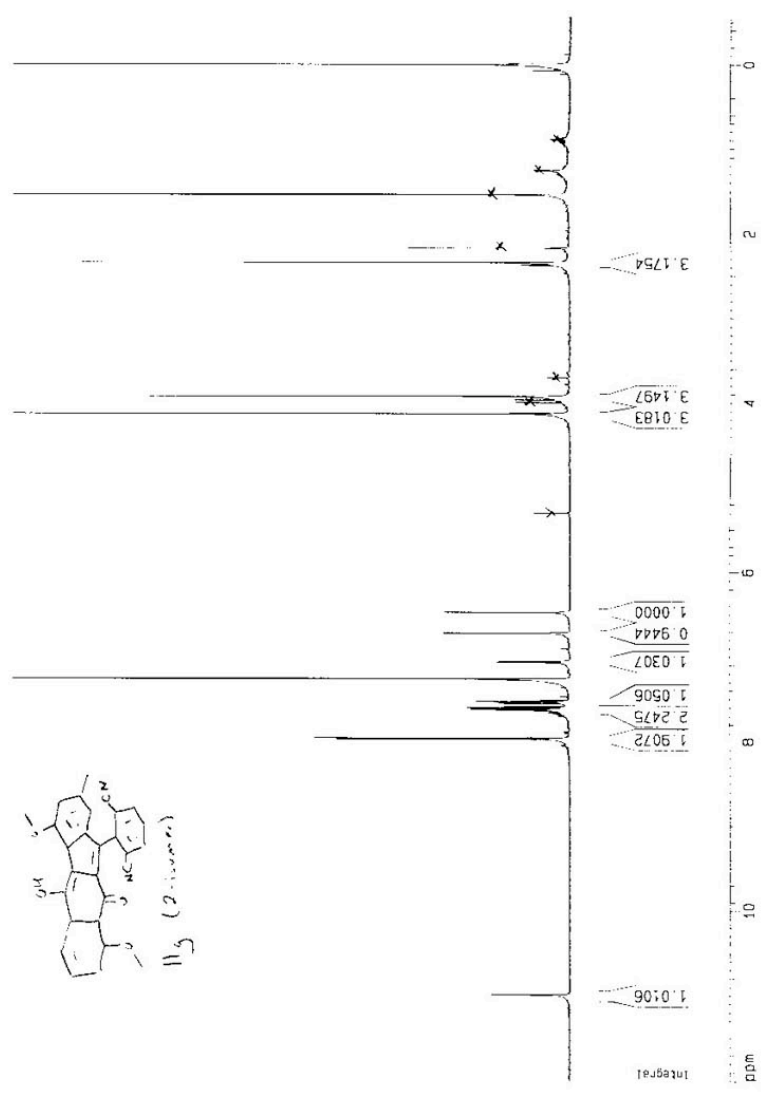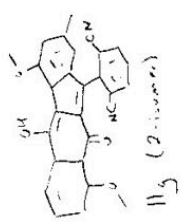

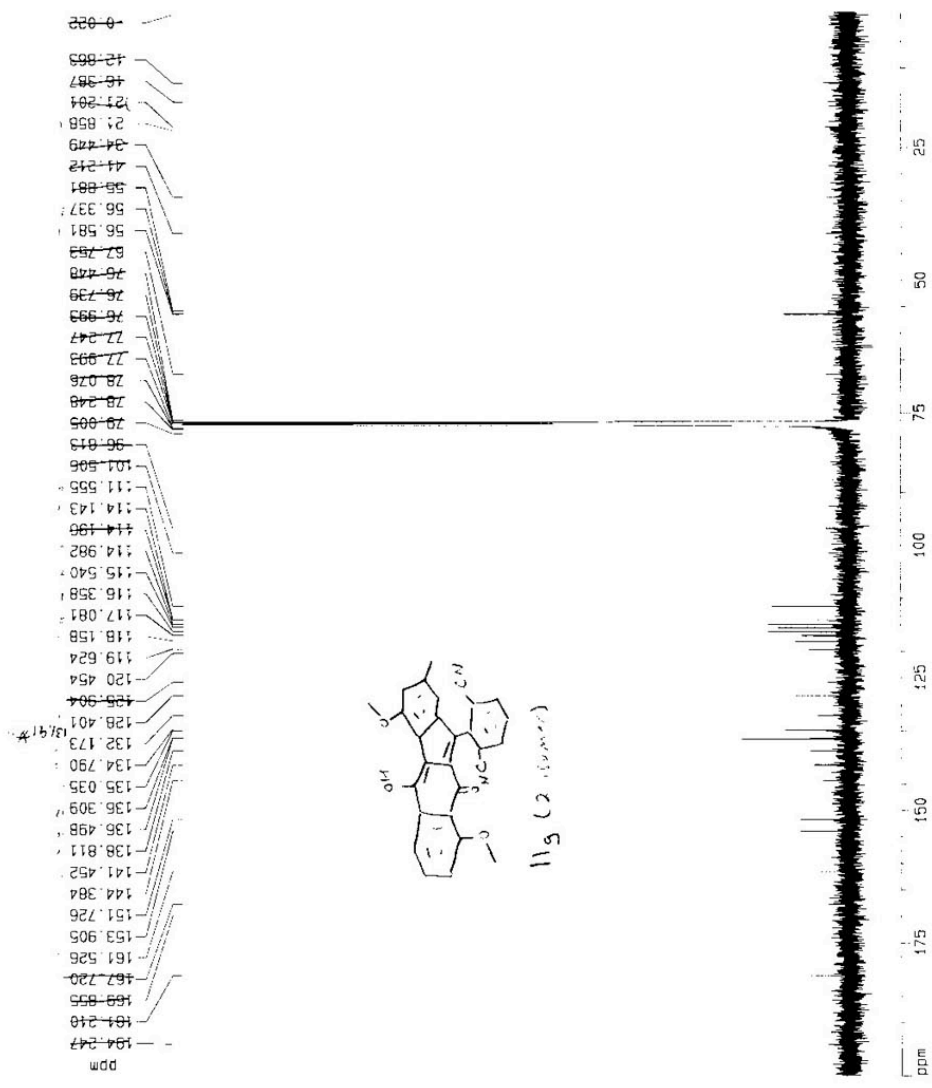

Current Data Parameters  
 NAME KJF-5-12-05  
 EXPNO 8  
 PROCNO 1  
 F2 - Acquisition Parameters  
 Date\_ 20050513  
 Time 9:49  
 INSTRUM spect  
 PROBHD 5 mm QNP 13  
 PULPROG zgpg30  
 TD 65536  
 SOLVENT CDCl3  
 NS 8982  
 DS 2  
 SWH 41888.888 Hz  
 FIDRES 0.635783 Hz  
 AQ 0.7864820 sec  
 RG 32768  
 DM 12.000 usec  
 DE 17.74 usec  
 TE 300.0 K  
 LC1 0.08  
 J1 2.00000000 sec  
 CPOPRG waltz16  
 P31 120.00 usec  
 S4 55 dB  
 D11 0.0300000 sec  
 S2 21 dB  
 P1 9.79 usec  
 S-01 125.736214 MHz  
 NUCLEUS 13C  
 F2 - Processing Parameters  
 SI 32768  
 SF 125.757920 MHz  
 KM EM  
 SS 0  
 B 1.00 Hz  
 GB 0  
 PC 0.50  
 LD NMR plot parameters  
 CX 20.00 cr  
 F1 200.000 phr  
 F2 25151.55 Hz  
 S2 0.500 ppm  
 S3 -62.88 Hz  
 GAMMA 10.02500 ppm/cm  
 LCEN 1250.72160 Hz/cm

## References

- (1) Gould, S. J.; Melville, C. R. *Tetrahedron Lett.* **1997**, 38, 1473-1476
